# Supplementary material for: Evaluating the Effect of Intensity Standardisation on Longitudinal Whole Brain Atrophy Quantification in Brain Magnetic Resonance Imaging
Source: Preprints.org preprint supplement (doi:10.20944/preprints202012.0373.v1), 2020-12-15
Supplement: Supplementary file 1 [file supplementary]

## Sheet: TableA1Oasis-BeforeRegistration
		PBVC(%)
SubjectID	Demented-nondemented	None	Zscore	Fuzzy c-means	Gaussian Mixture model	Kernel density estimation	Histogram Matching	White stripe	RAVEL
OAS2_0002	Demented	-0.766129	-1.40968	-1.06286	-1.10448	-1.08469	-0.208401	-1.77214	-1.00713
OAS2_0004	Nondemented	-0.0707306	0.285529	-0.137357	-0.112278	-0.151909	-0.237096	-2.59028	0.338294
OAS2_0005	Nondemented	-0.242268	-0.810122	-0.473659	-0.407076	-0.48599	-0.11717	1.01732	-0.546666
OAS2_0007	Demented	-0.288983	-0.218221	-0.310557	-0.314499	-0.339323	0.0133563	0.0590483	-1.86296
OAS2_0008	Nondemented	0.0394284	1.74794	0.155304	-0.0622898	0.160258	-0.164282	-6.0703	0.386735
OAS2_0009	Demented	0.135693	0.12281	0.252791	0.229136	0.279472	-0.205965	-2.75796	0.974342
OAS2_0010	Demented	-0.225024	0.0232491	-0.348488	-0.334546	-0.419222	-0.143342	-73.9486	-0.183136
OAS2_0012	Nondemented	-0.389483	-0.482256	-0.554922	-0.560925	-0.514572	-0.49959	0.814978	-0.127028
OAS2_0013	Nondemented	-0.0978745	-3.85644	-0.201034	-0.22775	-0.264616	0.109207	4.18891	-0.0371034
OAS2_0014	Demented	-0.95121	-1.2973	-1.26783	-1.28353	-1.32496	-1.20969	-2.23037	0.272447
OAS2_0016	Demented	-0.132337	-1.08078	-0.299381	-0.247696	-0.252801	-0.200208	-1.43365	-0.352339
OAS2_0017	Nondemented	-0.00978904	-0.330632	-0.166086	-0.162726	-0.178467	-0.42738	48.2925	0.979929
OAS2_0022	Nondemented	-0.269082	-0.331506	-0.413074	-0.401998	-0.389386	-0.283166	0.299055	-0.431721
OAS2_0023	Demented	-0.381129	-0.0721551	-0.849857	-0.825089	-0.846743	-0.186757	-0.149126	-0.417576
OAS2_0026	Demented	-0.782803	-1.80972	-1.27928	-1.29261	-1.30372	-0.579776	-0.891872	-0.320984
OAS2_0027	Nondemented	-0.148943	-0.871066	-0.123923	-0.118235	-0.0908305	-0.415326	-7.78701	-0.209054
OAS2_0028	Demented	-0.596866	-0.248576	-0.827086	-0.764481	-0.782286	-0.420346	1.63	-0.228277
OAS2_0030	Nondemented	-0.212806	0.413842	-0.229994	-0.233304	-0.242016	-0.207954	-2.36193	-0.319659
OAS2_0032	Demented	-0.0526723	-0.675441	-0.148692	-0.173389	-0.174037	-0.0613632	2.67874	-0.143933
OAS2_0034	Nondemented	-0.213625	0.128825	-0.234652	-0.253052	-0.221094	-0.30494	-2.02741	-0.471257
OAS2_0035	Nondemented	0.165354	-0.612299	0.44448	0.519638	0.461558	0.0789031	-4.82066	-0.406322
OAS2_0036	Nondemented	-0.188425	-0.612766	-0.184503	-0.234522	-0.243219	-0.295261	0.566327	-0.143184
OAS2_0039	Demented	-0.349871	-0.0512607	-0.821505	-0.892684	-0.825343	-0.419102	-78.5503	0.321055
OAS2_0040	Demented	-0.82804	-1.93113	-1.58589	-1.58326	-1.60088	-0.73641	1.52517	-0.468561
OAS2_0042	Nondemented	-0.19545	-0.297029	-0.281787	-0.272496	-0.270225	-0.158889	-0.198976	-0.162632
OAS2_0043	Demented	-0.874768	-1.03887	-1.34303	-1.36439	-1.40129	-0.732025	1.81667	-0.941819
OAS2_0044	Demented	0.515399	-0.902271	-0.775444	-0.765816	-0.760341	-0.681511	-2.89261	1.22926
OAS2_0045	Nondemented	0.0953847	0.431246	0.19594	0.183891	0.188192	0.207494	10.8108	-0.0705695
OAS2_0046	Demented	-0.582356	-0.431862	-0.784864	-0.798235	-0.807016	-0.633401	-10.9514	0.509948
OAS2_0047	Nondemented	0.0507549	1.31793	-0.00843781	0.0303003	0.0732028	-0.0477384	-0.780007	0.317076
OAS2_0048	Demented	-1.31971	-2.56381	-2.16101	-2.13578	-2.19122	-1.07494	3.14436	-3.50399
OAS2_0049	Nondemented	0.468873	1.95419	1.11799	0.986124	1.10163	0.0805033	9.4863	-0.0678808
OAS2_0050	Demented	-1.57899	-2.37961	-2.76173	-2.61762	-2.77409	-1.35337	-3.96492	-1.2022
OAS2_0051	Nondemented	-0.305859	-0.321814	-0.464696	-0.460097	-0.453614	-0.275266	-1.36101	-0.225351
OAS2_0053	Nondemented	-0.26002	-0.721508	-0.422423	-0.455125	-0.423369	-0.292635	-2.98642	0.241439
OAS2_0055	Nondemented	-0.155138	0.63275	-0.177998	-0.178674	-0.126237	-0.070089	-2.39535	0.00645361
OAS2_0056	Nondemented	-0.244148	0.608485	-0.343214	-0.271007	-0.302748	-0.141734	2.3575	-0.526268
OAS2_0057	Nondemented	-0.426506	-0.215193	-0.640751	-0.618497	-0.649887	-0.29233	2.05794	-0.718639
OAS2_0058	Demented	-0.79199	-0.862708	-0.950352	-0.79793	-0.91244	-0.984557	69.0361	-0.293891
OAS2_0061	Nondemented	-0.507616	0.0615939	-0.711118	-0.715489	-0.693789	-0.421151	-1.39855	-0.282704
OAS2_0062	Nondemented	-0.736804	-2.39612	-1.23083	-1.2135	-1.29881	-0.47495	-0.601871	-0.783753
OAS2_0063	Demented	-0.443459	-0.654132	-0.976051	-1.00889	-0.995307	-0.16231	2.20488	-0.0327479
OAS2_0064	Demented	-0.371648	0.0332964	-0.937543	-0.89374	-0.888835	-0.287877	-7.39444	-0.12531
OAS2_0066	Demented	-0.79827	-1.14483	-0.978908	-1.01546	-1.02906	-1.02804	-5.94482	-0.120223
OAS2_0067	Nondemented	-0.214836	1.11095	0.450771	-0.192127	0.421146	-0.747362	-10.1807	-0.161024
OAS2_0068	Nondemented	-0.270273	-0.670851	-0.662752	-0.653979	-0.705519	-0.224304	14.1354	0.123064
OAS2_0069	Nondemented	-0.136983	-0.0417553	-0.332577	-0.328221	-0.397157	-0.228662	1.869	0.390656
OAS2_0070	Nondemented	0.212944	-0.135557	0.249104	0.237169	0.225542	-0.439666	-7.78735	0.253465
OAS2_0071	Demented	-0.39433	-1.12966	-0.77787	-0.744595	-0.80159	-0.286315	-5.90029	-0.64443
OAS2_0073	Nondemented	-0.460768	-1.84239	-0.528858	-0.488164	-0.521377	-0.544152	-11.1928	-0.106559
OAS2_0075	Demented	-0.222631	0.0759927	-0.374449	-0.373683	-0.307819	-0.260772	-3.05168	-0.257512
OAS2_0076	Nondemented	-0.115162	-0.498697	-0.202982	-0.22394	-0.227854	0.0323174	5.62028	0.393271
OAS2_0078	Nondemented	-0.263389	-0.894749	-0.437275	-0.41468	-0.351234	-0.293335	-0.43259	-0.592726
OAS2_0079	Demented	-1.13722	-3.02076	-1.66533	-1.63001	-1.70076	-0.845302	-2.84941	error robex
OAS2_0080	Demented	0.468055	1.03792	1.0269	1.04758	1.02353	0.204684	1.49546	-1.19558
OAS2_0081	Demented	-0.516011	-0.878312	-0.918764	-0.925732	-0.935044	-0.535006	0.626786	-1.05401
OAS2_0085	Nondemented	0.205635	-1.08852	0.482252	0.535019	0.543308	0.119104	-1.15239	0.313688
OAS2_0086	Nondemented	-0.264326	0.237214	-0.409456	-0.362075	-0.387926	-0.290832	-2.7377	0.0879409
OAS2_0087	Demented	-0.553951	-1.66222	-1.25409	-1.25131	-1.24702	-0.331796	0.469998	-0.564816
OAS2_0088	Demented	-0.940094	-2.59046	-1.80801	-1.77845	-1.83719	-0.766482	-0.156692	-0.193099
OAS2_0089	Demented	-0.30345	-0.77722	-0.86436	-0.87294	-0.871306	-0.408092	-4.19549	-0.899164
OAS2_0090	Nondemented	-0.249295	-0.746172	-0.387753	-0.34246	-0.386343	-0.429968	0.688857	0.0151263
OAS2_0094	Nondemented	-0.112729	-0.654657	-0.123459	-0.140226	-0.122702	-0.270548	-1.47994	0.271107
OAS2_0095	Nondemented	-0.439572	-1.13633	-0.819213	-0.782882	-0.777865	-0.353183	3.95483	-0.761481
OAS2_0096	Nondemented	-0.052556	0.352457	-0.0304409	-0.0557695	-0.0409264	0.173199	-18.3822	-0.0302859
OAS2_0098	Demented	-0.0623291	-1.62075	-0.108896	-0.143319	-0.130301	-0.166147	0.739959	-0.347263
OAS2_0099	Demented	0.0984048	-0.588226	0.122261	0.115787	0.137017	-0.0167981	-0.0809196	0.453683
OAS2_0101	Nondemented	-0.415749	-0.279058	-0.715844	-0.693194	-0.706931	-0.278667	0.955192	-0.387464
OAS2_0102	Demented	-0.317935	-0.524897	-0.505094	-0.50779	-0.543303	-0.327642	-0.954371	-0.340056
OAS2_0104	Demented	-0.81804	-2.01377	-1.40508	-1.38015	-1.31445	-0.729112	0.61351	-0.314002
OAS2_0105	Nondemented	-0.00871404	0.257382	-0.0314657	-0.0419615	-0.0483584	-0.482314	-2.84936	-0.441883
OAS2_0106	Demented	-0.94743	-2.48265	-1.68471	-1.68206	-1.71578	-0.4692	-2.80301	-0.765112
OAS2_0108	Demented	-0.174202	0.228942	-0.254577	-0.209562	-0.183778	-0.193355	-2.82287	-0.298794
OAS2_0109	Nondemented	-0.0879736	-0.365241	-0.161033	-0.132017	-0.163958	-0.0839567	0.275515	0.0792815
OAS2_0111	Demented	-1.08893	-2.17219	-1.78007	-1.77503	-1.7965	-0.852391	2.33699	-0.91303
OAS2_0112	Demented	-0.461132	-0.0152868	-1.1875	-1.23718	-1.17193	-0.608612	-22.1294	1.02699
OAS2_0113	Demented	-0.427614	-0.597815	-0.679681	-0.546871	-0.578504	-0.343914	-1.74324	-1.20932
OAS2_0114	Demented	-1.2097	-2.34857	-2.15101	-2.15277	-2.18398	-0.910842	-12.2994	-1.41509
OAS2_0116	Demented	0.172693	-0.779581	0.629785	0.662385	0.640382	0.110618	-7.27104	0.0424093
OAS2_0117	Nondemented	-0.0730127	-0.195259	-0.0403686	0.0225432	0.684853	-0.192674	-1.17343	-0.0950964
OAS2_0119	Nondemented	-0.170799	1.15446	-0.228869	-0.238109	-0.193059	-0.339698	-0.990119	0.154592
OAS2_0120	Demented	-0.652676	-0.62052	-1.16399	-1.1532	-1.13001	-0.827198	-5.26123	-0.0782907
OAS2_0121	Nondemented	-0.330285	0.443839	-0.700536	-0.673586	-0.688845	-0.236422	-0.723202	-0.54329
OAS2_0122	Nondemented	0.0868572	0.345515	0.102876	0.175992	0.0816023	-0.255121	-7.45205	-0.637732
OAS2_0124	Demented	-0.027612	-0.090411	-0.142673	-0.129457	-0.0924575	-0.0909125	1.84276	-0.501024
OAS2_0126	Nondemented	0.00604725	-0.257437	-0.0634342	-0.0149171	-0.0255771	-0.0635966	1.19172	-0.0959517
OAS2_0129	Nondemented	-0.0406497	0.311347	-0.0390951	-0.0459147	-0.0308145	-0.0865704	0.323509	-0.114813
OAS2_0134	Demented	-0.365605	-0.490415	-0.610899	-0.619627	-0.631418	-0.517247	2.35237	0.0516163
OAS2_0137	Demented	-0.193763	-0.949815	-0.398636	-0.430488	-0.433547	-0.388547	-4.20687	0.348154
OAS2_0138	Nondemented	-0.247687	0.00432154	-0.278358	-0.2743	-0.287332	-0.0727974	-1.14985	0.738647
OAS2_0139	Demented	-1.24277	-1.80647	-1.58825	-1.70011	-1.55053	-0.988654	0.890122	-1.38919
OAS2_0140	Demented	-0.293575	-1.5482	-0.50904	-0.483152	-0.54553	-0.221306	-0.357171	-0.223451
OAS2_0141	Nondemented	-0.0668755	-1.82074	-0.08951	-0.107211	-0.0566125	0.0181364	-0.939964	-0.25213
OAS2_0142	Nondemented	-0.31904	-0.525844	-0.416482	-0.331593	-0.408833	-0.134177	-0.603309	-0.0921211
OAS2_0143	Nondemented	-0.0905278	-0.238848	-0.0768777	-0.0200262	-0.0846397	-0.00741061	5.8416	-0.369525
OAS2_0146	Demented	-0.590592	-1.52306	-1.12705	-1.17045	-1.20317	-0.536889	-1.17559	-1.04408
OAS2_0147	Nondemented	-0.0910634	1.6741	-0.104983	-0.0991888	-0.0980025	-0.311071	-2.48427	0.941192
OAS2_0149	Nondemented	-0.181346	1.6562	-0.252171	-0.230727	-0.289904	-0.278412	-13.3483	0.0972026
OAS2_0150	Demented	-0.410907	-0.574144	-0.686336	-0.63839	-0.649985	-0.444344	9.36439	0.218669
OAS2_0152	Nondemented	-0.163149	0.373175	-0.144533	-0.109583	-0.117114	-0.0690746	0.942981	-0.125646
OAS2_0154	Nondemented	0.785197	2.49903	3.84052	3.7233	3.77163	-0.13131	-8.66178	1.19326
OAS2_0156	Nondemented	-0.202371	0.396037	-0.31467	-0.305839	-0.291641	-0.0566502	-2.33966	-0.196462
OAS2_0157	Demented	-1.44308	-3.38387	-2.83371	-2.79852	-2.82253	-1.28834	-6.85447	-0.766666
OAS2_0159	Demented	0.118147	0.211102	0.0779653	0.0686695	0.05689	0.28063	-0.445778	0.0567625
OAS2_0160	Demented	-0.409221	0.102421	-0.758198	-0.691435	-0.752987	-0.404056	-162.49	0.0204773
OAS2_0161	Nondemented	0.205081	1.55915	0.383781	0.317244	0.339306	0.244814	-0.00474339	-0.67111
OAS2_0162	Demented	-0.465699	-1.03199	-0.916492	-0.7558	-0.90095	-0.0563201	1.41708	-0.200317
OAS2_0164	Demented	-0.293443	-0.95952	-0.473421	-0.464966	-0.45008	-0.122184	-2.43666	-0.454434
OAS2_0165	Demented	-1.04934	-1.83539	-1.87412	-1.90711	-1.87507	-0.860249	-33.4074	0.150656
OAS2_0169	Nondemented	0.0713387	0.325151	0.0780413	0.113846	0.0900829	0.046758	1.36944	-0.0633209
OAS2_0171	Nondemented	-0.0900843	-0.140496	-0.066316	-0.075059	-0.0456317	-0.204108	1.00927	-0.20151
OAS2_0174	Nondemented	-0.375142	0.0325559	-0.427591	-0.420408	-0.454874	-0.216209	4.2629	-0.347475
OAS2_0175	Demented	-0.54413	-0.76907	-0.781413	-0.732164	-0.753057	-0.403675	1.87091	-0.307922
OAS2_0177	Nondemented	-0.0931134	0.588491	-0.193878	-0.171866	-0.16217	0.114083	1.87644	-0.132949
OAS2_0178	Nondemented	-0.360627	0.226038	-0.417177	-0.464691	-0.428908	-0.14819	-4.58587	0.353779
OAS2_0179	Demented	-0.536312	0.138714	-1.02052	-1.03321	-0.98254	-0.536932	0.482155	-0.364217
OAS2_0181	Demented	0.201536	-0.0883212	0.379082	0.386172	0.379133	0.261557	-2.39366	-0.105291
OAS2_0182	Demented	-1.01202	-1.98324	-1.68861	-1.63559	-1.67013	-0.937362	-0.451876	-0.542178
OAS2_0183	Nondemented	-1.87368	-4.16619	-3.16753	-2.73127	-2.88421	-0.957745	-0.211776	-1.17166
OAS2_0184	Demented	-1.17219	-2.1339	-1.88167	-1.83309	-1.92096	-0.86314	4.11435	-1.59927
OAS2_0185	Demented	-0.453202	-1.95842	-0.883326	-0.901555	-0.89223	-0.35422	-7.58333	-0.60555
OAS2_0186	Nondemented	0.0429437	-0.491236	0.139956	0.134055	0.125255	0.00726412	-3.93334	-0.0230952

## Sheet: TableA1Oasis-AfterRegistration
		PBVC(%)
SubjectID	Demented-nondemented	None	Zscore	Fuzzy c-means	Gaussian Mixture model	Kernel density estimation	Histogram Matching	White stripe	RAVEL
OAS2_0002	Demented	-0.766129	-1.14875	-1.10463	-1.07957	-1.10267	-0.24388	-0.994816	-0.964292
OAS2_0004	Nondemented	-0.0707306	-0.160474	-0.0929664	-0.121898	-0.0881529	-0.311873	-0.132469	-0.166601
OAS2_0005	Nondemented	-0.242268	-0.461402	-0.445949	-0.477522	-0.445753	-0.111816	-0.387272	-0.325936
OAS2_0007	Demented	-0.288983	-0.313431	-0.342279	-0.165423	-0.343488	0.223813	-0.315186	-0.322282
OAS2_0008	Nondemented	0.0394284	-0.151044	0.114014	0.1002	0.11413	-0.233714	-0.139601	-0.170561
OAS2_0009	Demented	0.135693	0.186083	0.241695	0.173575	0.243641	-0.32908	0.14702	0.041335
OAS2_0010	Demented	-0.225024	-0.367234	-0.362631	-0.359108	-0.362801	-0.094422	-0.304477	-0.283045
OAS2_0012	Nondemented	-0.389483	-0.578263	-0.547619	-0.59322	-0.54767	-0.562608	-0.507785	-0.480614
OAS2_0013	Nondemented	-0.0978745	-0.228125	-0.286993	-0.325049	-0.287033	0.106377	-0.146707	-0.130804
OAS2_0014	Demented	-0.95121	-1.34436	-1.32858	-1.44071	-1.3297	-1.29458	-1.18716	-1.06107
OAS2_0016	Demented	-0.132337	-0.312188	-0.288364	-0.253611	-0.288234	-0.21136	-0.266303	-0.327352
OAS2_0017	Nondemented	-0.00978904	-0.110116	-0.171225	-0.34323	-0.160186	-0.532246	-0.0562414	-0.103652
OAS2_0022	Nondemented	-0.269082	-0.443091	-0.394641	-0.326562	-0.393858	-0.28794	-0.366137	-0.503045
OAS2_0023	Demented	-0.381129	-0.932552	-0.782693	-0.926343	-0.788466	-0.138801	-0.685287	-0.260192
OAS2_0026	Demented	-0.782803	-1.25599	-1.27312	-1.31018	-1.27232	-0.502222	-1.09406	-0.864975
OAS2_0027	Nondemented	-0.148943	-0.0799554	-0.101076	-0.0916582	-0.10232	-0.467605	-0.125428	-0.175934
OAS2_0028	Demented	-0.596866	-0.803086	-0.839126	-0.796954	-0.838863	-0.320912	-0.734242	-0.730257
OAS2_0030	Nondemented	-0.212806	-0.201404	-0.259661	-0.218733	-0.258247	-0.1851	-0.179697	-0.184246
OAS2_0032	Demented	-0.0526723	-0.236193	-0.175871	-0.237119	-0.179552	-0.129868	-0.0878268	-0.0608456
OAS2_0034	Nondemented	-0.213625	-0.332956	-0.277258	-0.256764	-0.278736	-0.403365	-0.302625	-0.400474
OAS2_0035	Nondemented	0.165354	0.479633	0.527083	0.625633	0.526339	0.15549	0.298786	0.17853
OAS2_0036	Nondemented	-0.188425	-0.257916	-0.247323	-0.251789	-0.246435	-0.316572	-0.234842	-0.230222
OAS2_0039	Demented	-0.349871	-0.872538	-0.83152	-0.942053	-0.829391	-0.440782	-0.556786	-0.530583
OAS2_0040	Demented	-0.82804	-1.58986	-1.58851	-1.72683	-1.58545	-0.737851	-1.24036	-1.03578
OAS2_0042	Nondemented	-0.19545	-0.289298	-0.290025	-0.348621	-0.288705	-0.167072	-0.260431	-0.155453
OAS2_0043	Demented	-0.874768	-1.41044	-1.36814	-1.27362	-1.37028	-0.71708	-1.14507	-1.27767
OAS2_0044	Demented	0.515399	-0.599233	-0.800335	-0.98496	-0.800325	-0.78423	-0.602566	-0.46215
OAS2_0045	Nondemented	0.0953847	0.148114	0.155694	0.115976	0.153014	0.19479	0.119743	0.218873
OAS2_0046	Demented	-0.582356	-0.831292	-0.798931	-0.759416	-0.799009	-0.676487	-0.755281	-0.836596
OAS2_0047	Nondemented	0.0507549	0.0692261	-0.0360193	-0.151895	-0.0372285	-0.102425	0.0957145	0.222425
OAS2_0048	Demented	-1.31971	-2.15787	-2.09301	-2.15223	-2.0909	-1.11478	-1.8674	-1.8818
OAS2_0049	Nondemented	0.468873	0.989908	1.05006	1.29525	1.05021	-0.0277539	0.661907	0.205246
OAS2_0050	Demented	-1.57899	-2.86732	-2.67102	-2.94431	-2.67087	-1.32699	-2.51094	-2.01936
OAS2_0051	Nondemented	-0.305859	-0.371454	-0.477201	-0.521278	-0.476558	-0.262763	-0.346565	-0.255917
OAS2_0053	Nondemented	-0.26002	-0.401153	-0.439461	-0.428013	-0.440289	-0.335271	-0.327732	-0.276754
OAS2_0055	Nondemented	-0.155138	-0.162098	-0.129535	-0.0852195	-0.128816	-0.0333729	-0.189629	-0.190798
OAS2_0056	Nondemented	-0.244148	-0.337778	-0.321493	-0.256973	-0.322447	-0.0828585	-0.318984	-0.37548
OAS2_0057	Nondemented	-0.426506	-0.64494	-0.646812	-0.640726	-0.647304	-0.323806	-0.528855	-0.54338
OAS2_0058	Demented	-0.79199	-0.895533	-0.973044	-0.538134	-0.96997	-1.163	-0.900198	-1.3595
OAS2_0061	Nondemented	-0.507616	-0.723078	-0.717499	-0.660443	-0.714615	-0.394812	-0.662078	-0.68243
OAS2_0062	Nondemented	-0.736804	-1.40951	-1.25211	-1.31448	-1.25214	-0.389945	-1.16115	-1.08842
OAS2_0063	Demented	-0.443459	-0.979533	-0.987437	-1.11538	-0.989593	-0.0917491	-0.706931	-0.513108
OAS2_0064	Demented	-0.371648	-0.879742	-0.899503	-0.993539	-0.88635	-0.230658	-0.596892	-0.414262
OAS2_0066	Demented	-0.79827	-0.997809	-1.03522	-1.0511	-1.03399	-1.11933	-0.913708	-0.793464
OAS2_0067	Nondemented	-0.214836	-0.214075	-0.20113	-0.218247	-0.200584	-0.831991	-0.231172	-0.130639
OAS2_0068	Nondemented	-0.270273	-0.62062	-0.666053	-0.790943	-0.66531	-0.263228	-0.450757	-0.265453
OAS2_0069	Nondemented	-0.136983	-0.29704	-0.312493	-0.341296	-0.312937	-0.146753	-0.193995	-0.207691
OAS2_0070	Nondemented	0.212944	0.259935	0.274282	0.199104	0.273595	-0.625158	0.231199	0.168348
OAS2_0071	Demented	-0.39433	-0.712095	-0.7615	-0.881	-0.75921	-0.261995	-0.60419	-0.398015
OAS2_0073	Nondemented	-0.460768	-0.409819	-0.509666	-0.415843	-0.510969	-0.543826	-0.428771	-0.481514
OAS2_0075	Demented	-0.222631	-0.293257	-0.294197	-0.256748	-0.294035	-0.241912	-0.264765	-0.331854
OAS2_0076	Nondemented	-0.115162	-0.136407	-0.229039	-0.171773	-0.229975	0.0832112	-0.0912156	-0.0445006
OAS2_0078	Nondemented	-0.263389	-0.383019	-0.47921	-0.486355	-0.477274	-0.347149	-0.327416	-0.283211
OAS2_0079	Demented	-1.13722	-1.72891	-1.66655	-1.59816	-1.66793	-0.801673	-1.42498	-1.45247
OAS2_0080	Demented	0.468055	0.990932	1.0474	1.23362	1.04431	0.252222	0.70546	-0.112939
OAS2_0081	Demented	-0.516011	-0.870176	-0.930544	-1.08843	-0.928333	-0.583833	-0.705494	-0.558898
OAS2_0085	Nondemented	0.205635	0.481495	0.484847	0.494024	0.484958	0.0974509	0.334853	0.353927
OAS2_0086	Nondemented	-0.264326	-0.357215	-0.378788	-0.375146	-0.378041	-0.315635	-0.307811	-0.319124
OAS2_0087	Demented	-0.553951	-1.26133	-1.28397	-1.38425	-1.28884	-0.263211	-0.939413	-0.749579
OAS2_0088	Demented	-0.940094	-2.01914	-1.7885	-2.02246	-1.78798	-0.705948	-1.63779	-1.21501
OAS2_0089	Demented	-0.30345	-0.815039	-0.877076	-1.08636	-0.877426	-0.371201	-0.574029	-0.309394
OAS2_0090	Nondemented	-0.249295	-0.415863	-0.327579	-0.352497	-0.328948	-0.436694	-0.364756	-0.408613
OAS2_0094	Nondemented	-0.112729	-0.103598	-0.10111	-0.0896752	-0.0994301	-0.313043	-0.121457	-0.13509
OAS2_0095	Nondemented	-0.439572	-0.803999	-0.81395	-0.866185	-0.815033	-0.299654	-0.681232	-0.582417
OAS2_0096	Nondemented	-0.052556	-0.040713	-0.0589301	-0.0561033	-0.057145	0.208516	-0.0321317	0.0604244
OAS2_0098	Demented	-0.0623291	-0.232797	-0.131874	-0.128344	-0.131528	-0.244281	-0.172305	-0.200887
OAS2_0099	Demented	0.0984048	0.152513	0.12045	-0.00706029	0.119735	-0.0583412	0.0938213	0.388144
OAS2_0101	Nondemented	-0.415749	-0.692639	-0.674605	-0.644295	-0.675113	-0.161644	-0.582599	-0.583292
OAS2_0102	Demented	-0.317935	-0.507147	-0.579183	-0.61315	-0.577744	-0.362611	-0.414867	-0.319175
OAS2_0104	Demented	-0.81804	-1.5367	-1.4117	-1.45077	-1.40917	-0.765973	-1.3675	-1.2949
OAS2_0105	Nondemented	-0.00871404	-0.0511351	-0.0379221	-0.129924	-0.0363729	-0.634566	-0.0242928	-0.0120234
OAS2_0106	Demented	-0.94743	-1.72854	-1.69898	-1.66817	-1.70058	-0.412068	-1.36463	-1.25618
OAS2_0108	Demented	-0.174202	-0.248376	-0.214919	-0.213234	-0.215065	-0.241501	-0.21534	-0.226539
OAS2_0109	Nondemented	-0.0879736	-0.162704	-0.159531	-0.1522	-0.159799	-0.0724368	-0.128293	-0.139724
OAS2_0111	Demented	-1.08893	-1.83101	-1.77255	-1.90116	-1.77261	-0.846269	-1.50535	-1.03443
OAS2_0112	Demented	-0.461132	-1.14062	-1.16026	-1.46614	-1.1473	-0.654916	-0.785585	-0.755573
OAS2_0113	Demented	-0.427614	-0.66399	-0.580296	-0.478534	-0.57993	-0.313404	-0.604905	-0.598421
OAS2_0114	Demented	-1.2097	-2.13964	-2.16958	-2.37315	-2.1683	-0.854444	-1.70663	-1.36442
OAS2_0116	Demented	0.172693	0.449332	0.552845	0.630081	0.552486	0.077457	0.278644	-0.0020472
OAS2_0117	Nondemented	-0.0730127	-0.0465312	-0.0269789	-0.0352453	-0.0261045	-0.208341	-0.0866051	-0.0968486
OAS2_0119	Nondemented	-0.170799	-0.20429	-0.221535	-0.153937	-0.224186	-0.363269	-0.175852	-0.30667
OAS2_0120	Demented	-0.652676	-1.14436	-1.14721	-1.2079	-1.14523	-0.845376	-0.924912	-0.965293
OAS2_0121	Nondemented	-0.330285	-0.538873	-0.634243	-0.614165	-0.633916	-0.17138	-0.436908	-0.417993
OAS2_0122	Nondemented	0.0868572	0.165959	0.182341	0.286276	0.182237	-0.333475	0.141509	-0.17667
OAS2_0124	Demented	-0.027612	-0.139368	-0.0880659	-0.10383	-0.0890411	-0.0201086	-0.0868143	-0.0579979
OAS2_0126	Nondemented	0.00604725	-0.0131269	-0.00522368	-0.0657387	-0.0081197	-0.12995	-0.0555156	0.0489927
OAS2_0129	Nondemented	-0.0406497	-0.0116731	-0.0412643	-0.0935195	-0.042079	-0.0756295	-0.0307699	-0.0196318
OAS2_0134	Demented	-0.365605	-0.514638	-0.560305	-0.567872	-0.56068	-0.482658	-0.412664	-0.392392
OAS2_0137	Demented	-0.193763	-0.448459	-0.432	-0.556865	-0.432677	-0.436487	-0.318517	-0.215892
OAS2_0138	Nondemented	-0.247687	-0.355424	-0.274188	-0.232988	-0.272654	-0.000906028	-0.331717	-0.250996
OAS2_0139	Demented	-1.24277	-1.62256	-1.63246	-1.52236	-1.63387	-0.909915	-1.42245	-1.56145
OAS2_0140	Demented	-0.293575	-0.553669	-0.488546	-0.525131	-0.490132	-0.200598	-0.44481	-0.391038
OAS2_0141	Nondemented	-0.0668755	-0.0909634	-0.046443	-0.0169977	-0.0457027	0.0937102	-0.100977	-0.13385
OAS2_0142	Nondemented	-0.31904	-0.395873	-0.437386	-0.383234	-0.438392	-0.090352	-0.34192	-0.355443
OAS2_0143	Nondemented	-0.0905278	-0.0797112	-0.0615913	-0.0582113	-0.0604625	-0.159097	-0.11477	-0.0359697
OAS2_0146	Demented	-0.590592	-1.26076	-1.13971	-1.29728	-1.14827	-0.534309	-0.978508	-0.665112
OAS2_0147	Nondemented	-0.0910634	-0.173309	-0.124075	-0.205059	-0.126991	-0.368613	-0.147543	-0.172185
OAS2_0149	Nondemented	-0.181346	-0.201667	-0.244962	-0.260279	-0.243932	-0.278613	-0.189117	-0.120128
OAS2_0150	Demented	-0.410907	-0.714749	-0.673361	-0.771519	-0.67325	-0.502278	-0.578303	-0.572715
OAS2_0152	Nondemented	-0.163149	-0.0752247	-0.131014	-0.0354708	-0.131989	0.0176034	-0.102003	-0.163017
OAS2_0154	Nondemented	0.785197	3.12814	3.82098	4.73019	3.82451	-0.924816	1.20683	0.395536
OAS2_0156	Nondemented	-0.202371	-0.314109	-0.304	-0.270556	-0.304169	-0.0279645	-0.272341	-0.286262
OAS2_0157	Demented	-1.44308	-2.76358	-2.797	-3.00241	-2.79472	-1.21539	-2.26049	-1.77143
OAS2_0159	Demented	0.118147	0.0413739	0.0806102	0.0441359	0.0787058	0.327847	0.0754925	0.15671
OAS2_0160	Demented	-0.409221	-0.84313	-0.792973	-0.8139	-0.793535	-0.340885	-0.683121	-0.50813
OAS2_0161	Nondemented	0.205081	0.172908	0.364763	0.429917	0.36523	0.195595	0.141459	-0.138342
OAS2_0162	Demented	-0.465699	-0.692445	-0.895822	-0.960864	-0.897024	-0.0441086	-0.505665	-0.316527
OAS2_0164	Demented	-0.293443	-0.385836	-0.420477	-0.517737	-0.421301	-0.0626541	-0.354975	-0.259087
OAS2_0165	Demented	-1.04934	-1.95081	-1.9519	-2.07681	-1.95233	-0.897658	-1.61697	-1.20851
OAS2_0169	Nondemented	0.0713387	-0.0209941	0.0968549	0.111521	0.0971925	-0.0010023	-0.0129039	-0.0103814
OAS2_0171	Nondemented	-0.0900843	-0.124024	-0.111699	-0.109463	-0.112024	-0.225782	-0.114003	-0.155222
OAS2_0174	Nondemented	-0.375142	-0.422998	-0.471247	-0.431509	-0.472579	-0.08515	-0.408043	-0.398247
OAS2_0175	Demented	-0.54413	-0.666395	-0.805467	-0.86693	-0.805685	-0.367224	-0.560559	-0.502289
OAS2_0177	Nondemented	-0.0931134	-0.137259	-0.131021	-0.141494	-0.131345	0.187808	-0.113809	-0.0603787
OAS2_0178	Nondemented	-0.360627	-0.409351	-0.449951	-0.379778	-0.450228	-0.0952102	-0.406069	-0.42708
OAS2_0179	Demented	-0.536312	-1.05018	-1.00262	-1.04303	-1.00253	-0.515603	-0.852132	-0.826544
OAS2_0181	Demented	0.201536	0.384733	0.394027	0.364187	0.394115	0.313426	0.268837	0.35234
OAS2_0182	Demented	-1.01202	-1.68079	-1.65351	-1.81938	-1.65091	-0.863066	-1.39971	-1.1117
OAS2_0183	Nondemented	-1.87368	-2.77401	-3.02726	-2.92505	-3.02633	-1.09796	-2.21332	-2.58792
OAS2_0184	Demented	-1.17219	-1.93313	-1.83413	-1.91652	-1.83295	-0.799682	-1.62678	-1.54455
OAS2_0185	Demented	-0.453202	-0.871298	-0.924033	-0.964101	-0.924964	-0.327939	-0.68748	-0.552649
OAS2_0186	Nondemented	0.0429437	0.100557	0.146184	0.0695685	0.141487	0.00812998	0.0585316	0.159512

## Sheet: TableA1ADNI-BeforeRegistration
		PBVC(%)
SubjectID	CN-AD	None	Zscore	Fuzzy c-means	Gaussian Mixture model	Kernel density estimation	Histogram Matching	White stripe	RAVEL
129_4371	CN	-0.988227	-1.16946	-1.8604	-1.30699	-1.91252	1.26324	-1.34478	error ravel
130_4660	AD	-1.17731	-1.28008	-2.1682	-2.08487	-2.17223	error	4.44876	-1.25112
002_4262	CN	-1.31187	7.65514	-4.4164	-4.43255	-4.36913	-1.39608	1.36149	-3.23415
137_4258	AD	-0.31951	-6.87799	-1.71394	-1.67433	-1.61735	-0.899204	-0.150468	0.84489
003_4288	CN	-2.3212	-2.02769	-2.54339	-1.84591	-2.47728	-1.96105	-2.14018	error ravel
006_4192	AD	-0.655164	-2.82823	-2.09171	-2.11345	-2.0703	-0.56164	1.18237	-0.8142
035_4464	CN	-0.362305	-5.69298	-0.54389	-0.719516	-0.46709	-1.03083	1.1055	-1.10902
016_4009	AD	-0.436997	0.124369	-0.168277	-0.169236	-0.226333	-0.304914	0.709137	-0.518634
130_4641	AD	-0.473006	-2.50964	-1.03347	-1.12653	-1.07613	-0.460462	2.51568	-0.3716
116_4625	AD	0.649967	-9.34398	0.743317	0.728024	0.726858	0.589167	-0.32014	0.908689
116_4483	CN	-1.99619	-7.34943	-2.78618	-2.77436	-2.73861	-1.62204	3.55392	-3.51109
023_4448	CN	1.16169	7.92669	1.37082	1.31753	1.37279	0.90603	-0.0867857	1.85608
098_4215	AD	0.072	-0.7991	0.048615	0.17558	0.069055	0.127135	-0.50542	0.02543
135_4657	AD	-2.52856	-3.69556	-3.62677	-3.60697	-3.5765	-1.96142	-6.06959	-1.21957
941_4292	CN	0.13704	1.16526	0.215393	0.184858	0.208392	-0.0322195	1.53155	-0.665377
009_4612	CN	0.710263	-5.26623	1.21074	1.28506	1.24229	0.514062	0.538977	-1.81208
127_4500	AD	-0.833557	-3.45887	-2.74308	-2.71336	-2.80395	-0.608578	-1.5069	-0.391456
094_4089	AD	-0.389941	-0.51171	-1.05466	-1.03151	-0.991846	-0.457356	0.534141	0.371249
029_4384	CN	-1.17495	-2.26999	-1.87587	-1.81595	-1.81194	-0.767241	0.59933	-1.18312
126_4494	AD	-1.78742	-2.76539	-3.42389	-3.63604	-3.10521	-1.4504	0.408191	-1.77599
123_4526	AD	-0.380673	-1.49421	-1.02981	-1.0935	-1.12347	-0.292036	2.05581	0.342295
006_4153	AD	-0.560253	2.94242	-1.01283	-0.977252	-1.05469	-0.671481	4.91641	0.017655
128_4832	CN	0.80833	5.61468	1.29831	1.22802	1.17258	0.715857	-1.04892	2.8973
094_4560	CN	0.910983	1.90023	1.25623	1.29375	1.2813	0.196071	3.65638	-0.271817
016_4591	AD	-0.461353	-2.3847	-0.48921	-0.468529	-0.4862	-0.541463	2.29221	-1.29954
023_4501	AD	-0.164386	-1.34322	-0.173469	-0.125693	-0.179008	-0.128259	-5.75212	-0.159265
099_4104	CN	-1.42153	-2.33566	-1.65544	-1.55852	-1.68242	-0.418299	-2.12221	error ravel
135_4676	AD	-0.335332	-0.492059	-0.432852	-0.413899	-0.476687	-0.354728	-4.82842	-0.410907
019_4477	AD	-0.314631	-6.62568	-1.9811	-1.98297	-1.97717	-0.340176	-1.93758	0.199466
137_4672	AD	-0.938759	-2.50094	-1.18676	-1.17729	-1.18068	-0.671234	-1.10902	-0.977423
014_4039	AD	-1.42231	-0.883796	-2.94311	-2.91393	-2.95671	-1.33316	-0.420065	error ravel
007_4516	CN	-1.28994	-2.6953	-1.74765	-1.79876	-1.72738	-0.561696	-2.82707	-1.71086
007_4568	AD	0.314965	2.05214	2.26745	2.35978	2.26768	0.460823	0.301345	-0.835449
129_4422	CN	0.036303	0.257184	0.270678	0.351494	0.307559	-0.228427	1.47928	error ravel
053_4578	CN	-0.878991	0.03492	-1.16264	-1.08194	-1.06873	-1.14179	-5.57778	-2.14196
153_4172	AD	-1.35783	-2.94277	-2.16592	-2.15649	-2.26399	-1.00101	-1.6665	-1.05916
129_4369	CN	-1.2547	-1.66761	-1.65026	-1.5244	-1.62524	-0.247785	-2.69868	error ravel
116_4195	AD	-0.826211	-7.48524	-0.923945	-1.00941	-0.924403	-0.780422	-0.644869	-1.02815
019_4252	AD	-0.217887	-0.959063	-0.639365	-0.764318	-0.784389	-0.192333	-0.027081	0.130902
137_4211	AD	-0.899254	-3.64387	-1.40776	-1.48199	-1.44851	-0.5605	-4.18311	-0.678045
094_4503	CN	-0.679793	1.03219	-1.19339	-1.54369	-1.20992	0.299595	-2.37139	-1.20444
029_4585	CN	0.988297	0.711897	1.7719	1.62676	1.78738	-0.0751437	-0.533931	0.85968
029_4385	CN	1.11299	2.51949	1.49249	1.99992	1.4544	0.850727	2.03729	1.38473

## Sheet: TableA1ADNI-AfterRegistration
		PBVC(%)
SubjectID	CN-AD	None	Zscore	Fuzzy c-means	Gaussian Mixture model	Kernel density estimation	Histogram Matching	White stripe	RAVEL
129_4371	CN	-0.988227	-1.59938	-1.91294	1.33872	-1.91732	-0.01702	-1.16617	-1.07046
130_4660	AD	-1.17731	-2.18744	-2.18983	-2.44559	-2.20134	-0.93662	-1.62191	-1.31572
002_4262	CN	-1.31187	-4.2418	-4.40559	-4.91633	-4.40618	-1.33126	-2.52755	-1.73642
137_4258	AD	-0.31951	-1.31871	-1.59384	-2.37196	-1.54138	-1.30417	-0.53598	0.19143
003_4288	CN	-2.3212	-2.33619	-2.49117	-2.15174	-2.4899	-2.05104	-2.29736	0.592487
006_4192	AD	-0.655164	-1.89593	-2.10867	-2.46593	-2.09974	-0.492302	-0.849097	-0.740379
035_4464	CN	-0.362305	-0.57406	-0.625878	-0.674725	-0.623537	0.17051	-0.388555	-0.075205
016_4009	AD	-0.436997	-0.450674	-0.357671	-0.263331	-0.373256	-0.554868	-0.492681	-1.04366
130_4641	AD	-0.473006	-1.10983	-1.10257	-1.23695	-1.10494	-0.46384	-0.784695	-0.573405
116_4625	AD	0.649967	0.776961	0.776628	0.733388	0.776446	0.497805	0.702082	0.861253
116_4483	CN	-1.99619	-2.68012	-2.79973	-2.94779	-2.80061	-1.67531	-2.11668	-2.01469
023_4448	CN	1.16169	1.3665	1.37315	1.2771	1.37335	0.852294	1.19996	1.34217
098_4215	AD	0.072	0.207515	0.20886	0.013195	0.213755	0.361755	0.155675	-0.01782
135_4657	AD	-2.52856	-3.58695	-3.59083	-3.82488	-3.58835	-1.80218	-2.8417	-2.68602
941_4292	CN	0.13704	0.190696	0.201119	0.187693	0.201436	-0.00092	0.150642	0.0590845
009_4612	CN	0.710263	1.2103	1.35098	1.45759	1.35336	0.725875	0.81977	0.623856
127_4500	AD	-0.833557	-2.61055	-2.72945	-2.9215	-2.72754	-0.661365	-1.5612	-1.1622
094_4089	AD	-0.389941	-1.0704	-1.1315	-1.53748	-1.12662	-0.34184	-0.742206	-0.029745
029_4384	CN	-1.17495	-1.65209	-1.74605	-1.72383	-1.74751	-0.800223	-1.3364	-1.46833
126_4494	AD	-1.78742	-3.26917	-3.20347	-3.52754	-3.20996	-1.43623	-2.4825	-2.68234
123_4526	AD	-0.380673	-1.10851	-1.08931	-1.24474	-1.09094	-0.259749	-0.731993	-0.556107
006_4153	AD	-0.560253	-0.93845	-0.950019	-0.999696	-0.951829	-0.683845	-0.707692	-0.684241
128_4832	CN	0.80833	1.12336	1.17757	1.22438	1.17793	0.682876	0.861186	0.837681
094_4560	CN	0.910983	1.28736	1.28963	1.30837	1.28906	0.256887	1.11879	1.07034
016_4591	AD	-0.461353	-0.496876	-0.457141	-0.351891	-0.456741	-0.526574	-0.518959	-0.589961
023_4501	AD	-0.164386	-0.16475	-0.157133	-0.113656	-0.158919	-0.127243	-0.192745	-0.297828
099_4104	CN	-1.42153	-1.73144	-1.70346	-1.62888	-1.70317	-0.500106	-1.5898	-1.65547
135_4676	AD	-0.335332	-0.480303	-0.472921	-0.519177	-0.472019	-0.368751	-0.399345	-0.382093
019_4477	AD	-0.314631	-1.86807	-1.97706	-2.30905	-1.9764	-0.270493	-0.79401	-0.039359
137_4672	AD	-0.938759	-1.17271	-1.16963	-1.26179	-1.16911	-0.562118	-0.976846	-0.967775
014_4039	AD	-1.42231	-2.88258	-2.94019	-2.94499	-2.94008	-1.10547	-1.86176	-1.62404
007_4516	CN	-1.28994	-1.75704	-1.74689	-1.81995	-1.74605	-0.618277	-1.52229	-1.52452
007_4568	AD	0.314965	1.9866	2.25392	2.76413	2.25493	0.441304	0.862893	-0.0593
129_4422	CN	0.036303	0.214393	0.287605	0.583636	0.289787	-0.164401	0.051849	-0.644968
053_4578	CN	-0.878991	-1.11255	-1.14362	-1.07333	-1.1456	-1.23996	-0.940963	-1.21654
153_4172	AD	-1.35783	-2.23604	-2.17136	-2.36444	-2.17656	-0.949851	-1.89345	-1.5218
129_4369	CN	-1.2547	-1.54629	-1.60403	-1.72849	-1.60815	0.440888	-1.35923	-1.44059
116_4195	AD	-0.826211	-0.924512	-0.917706	-0.919843	-0.917585	-0.641563	-0.857351	-0.885108
019_4252	AD	-0.217887	-0.648965	-0.703423	-0.861731	-0.702771	-0.166208	-0.341886	-0.148062
137_4211	AD	-0.899254	-1.45012	-1.4163	-1.63708	-1.41551	-0.411777	-1.19166	-0.877208
094_4503	CN	-0.679793	-1.09138	-1.26351	-0.317655	-1.26101	-0.614348	-0.920659	-0.919836
029_4585	CN	0.988297	1.63123	1.7371	1.72079	1.73774	-0.193966	1.24308	1.26439
029_4385	CN	1.11299	1.73941	1.51595	2.91341	1.50657	0.798103	1.4103	0.694335

## Sheet: Fig3Oasis-BeforeRegistration
		PBVC(%)
SubjectID	Demented-nondemented	None	Zscore	Fuzzy c-means	Gaussian Mixture model	Kernel density estimation	Histogram Matching	White stripe	RAVEL
OAS2_0002	Demented	-0.575769	-1.05713	-1.16613	-1.27875	-1.16485	-0.626002	5.0241	-1.86804
OAS2_0004	Nondemented	0.554122	1.98271	0.904453	0.950858	0.940473	0.551012	0.814792	0.267727
OAS2_0005	Nondemented	-0.103216	-0.157804	-0.150951	-0.13315	-0.205055	-0.074951	-0.0740165	-0.284845
OAS2_0007	Demented	0.426725	-0.088265	0.592975	0.624595	0.67936	0.584789	0.271625	1.7937
OAS2_0008	Nondemented	0.301862	0.486979	0.486845	0.0934815	0.21777	0.0879235	1.4912	0.193746
OAS2_0009	Demented	0.171969	0.299424	0.305092	0.231356	0.283288	0.172362	1.34854	3.03307
OAS2_0010	Demented	0.159269	0.0024505	0.178469	0.211794	0.24668	0.143993	-0.194525	0.554469
OAS2_0012	Nondemented	0.0640385	0.26311	0.0791965	0.0146345	0.055965	0.107525	1.05321	0.518685
OAS2_0013	Nondemented	0.0199935	2.11382	0.048413	0.018023	0.0066365	0.062129	-1.49488	1.06496
OAS2_0014	Demented	0.125502	0.729426	0.125166	0.224577	0.138822	0.080227	-0.229014	0.25913
OAS2_0016	Demented	-0.0378845	-0.437414	-0.22945	-0.23747	-0.247531	-0.0322815	0.929822	0.166824
OAS2_0017	Nondemented	0.666268	0.344135	1.7713	1.71529	1.75564	-0.539766	2.63476	-0.592595
OAS2_0022	Nondemented	-0.105404	0.344918	-0.210919	-0.205117	-0.116604	-0.109146	-0.295348	-0.627518
OAS2_0023	Demented	-0.118733	0.237333	-0.246802	-0.17894	-0.236654	-0.146878	-0.68392	-0.120639
OAS2_0026	Demented	-0.0542715	0.246479	-0.093137	-0.131457	-0.174431	-0.056705	-0.744045	0.002969
OAS2_0027	Nondemented	-0.250416	-1.08499	-0.41812	-0.41273	-0.441245	-0.244927	1.28612	-0.038315
OAS2_0028	Demented	-0.09902	0.05464	-0.155909	-0.0350955	-0.022482	-0.113705	2.93239	1.90169
OAS2_0030	Nondemented	-0.123576	-0.252439	-0.140402	-0.109705	-0.168294	-0.137683	0.256426	-0.100733
OAS2_0032	Demented	-0.0780745	-0.0857415	-0.123572	-0.0582325	-0.110224	-0.10752	3.33682	-0.779964
OAS2_0034	Nondemented	-0.03102	0.499362	-0.068279	-9e-06	-0.0190075	0.003011	-0.767154	1.05263
OAS2_0035	Nondemented	0.140458	0.106705	0.301162	0.776785	0.802635	0.111418	-1.18503	1.41566
OAS2_0036	Nondemented	-0.241213	-1.35273	-0.0963035	-0.166012	-0.128978	-0.700546	1.44918	1.53685
OAS2_0039	Demented	-0.00548	0.583152	0.035021	-0.0151065	0.020196	0.0295505	1.70714	-1.55659
OAS2_0040	Demented	-0.256428	-1.26072	-0.272429	-0.207298	-0.29449	-0.228909	-0.0706415	-0.517708
OAS2_0042	Nondemented	0.28214	-0.167631	0.330786	0.291994	0.322855	0.394956	-1.599	-0.43269
OAS2_0043	Demented	0.0012905	0.155481	-0.043472	0.031677	-0.002698	0.0195255	-0.305047	-1.06445
OAS2_0044	Demented	-0.057217	0.001596	-0.018915	-0.0101705	-0.004366	-0.042454	-1.22798	-0.461157
OAS2_0045	Nondemented	0.102915	1.78274	0.086042	0.0028095	0.0778435	0.066411	0.167297	0.622242
OAS2_0046	Demented	-0.0386905	0.99387	-0.007544	0.0004885	-0.0559055	-0.020928	-0.971499	-0.097172
OAS2_0047	Nondemented	-0.108349	1.45772	-0.396274	-0.379049	-0.285122	-0.085645	-0.829636	-0.591188
OAS2_0048	Demented	0.585684	-0.824059	1.06647	1.00699	1.07014	-0.0272325	1.00956	0.19524
OAS2_0049	Nondemented	1.01794	1.54519	1.80253	1.72415	1.81693	0.626918	2.60419	1.93035
OAS2_0050	Demented	0.129147	-1.15446	0.038647	0.0719095	-0.0090845	0.266353	-2.19579	-0.208858
OAS2_0051	Nondemented	-0.022457	-0.072956	0.0406021	0.004594	0.020226	-0.0462784	-0.264878	0.231687
OAS2_0053	Nondemented	0.0655215	-0.0757425	0.034367	0.167421	0.116582	0.0642265	-0.23249	0.278697
OAS2_0055	Nondemented	-0.0366775	1.24505	-0.12027	-0.108313	-0.085743	-0.000554	3.50416	0.191248
OAS2_0056	Nondemented	0.15392	0.36596	0.397043	0.327842	0.442772	0.108253	2.80808	0.722109
OAS2_0057	Nondemented	-0.301085	0.980975	-0.42435	-0.381862	-0.435742	-0.236138	13.0326	-0.401892
OAS2_0058	Demented	-0.110775	-1.16513	-0.220854	-0.194995	-0.183472	-0.094225	-0.432893	-1.37636
OAS2_0061	Nondemented	0.040987	-0.43718	-0.0323945	0.0280405	-0.015836	0.041789	2.34257	-0.576129
OAS2_0062	Nondemented	-0.032061	0.128388	-0.0833495	-0.000153	-0.054405	0.008878	-0.692095	0.28779
OAS2_0063	Demented	0.0179895	0.947578	-0.019424	-0.189279	-0.0588565	0.038341	1.17646	0.313756
OAS2_0064	Demented	0.145819	0.278541	0.299415	0.285011	0.290349	0.140751	-0.422932	-0.955295
OAS2_0066	Demented	0.020814	-0.470363	0.0884995	-0.0526005	0.0685945	0.032511	-2.69591	0.433704
OAS2_0067	Nondemented	0.539728	1.59153	1.12657	1.11389	1.16368	-0.246886	16.6892	0.733707
OAS2_0068	Nondemented	0.044429	-0.005668	0.073277	0.016988	-0.0349985	0.0136165	0.034251	-0.036205
OAS2_0069	Nondemented	0.0940847	-0.0244683	0.167118	0.118852	0.15816	0.116132	1.5285	0.206667
OAS2_0070	Nondemented	-0.019605	-0.317635	0.02839	0.00773	0.048745	-0.05076	0.082706	0.650252
OAS2_0071	Demented	-0.082189	-0.428084	-0.084045	-0.173609	-0.149557	-0.074963	1.30697	-0.428755
OAS2_0073	Nondemented	-0.065651	-1.80439	0.06308	0.153231	0.09583	-0.784524	-0.131775	-2.14101
OAS2_0075	Demented	0.107501	0.24002	0.0498079	0.163048	0.125781	0.177673	1.16447	-0.106973
OAS2_0076	Nondemented	-0.0292575	-0.889927	-0.001599	0.0187765	-0.0644095	0.09433	0.398905	-0.462443
OAS2_0078	Nondemented	-0.135958	2.61299	-0.349729	-0.334024	-0.32487	-0.051445	-0.70124	0.035353
OAS2_0079	Demented	0.045649	0.426114	0.00809	-0.160151	-0.015624	0.051941	1.15723	-0.308057
OAS2_0080	Demented	0.497804	0.815459	1.08216	0.97483	1.09257	0.441358	-0.947921	-0.132881
OAS2_0081	Demented	-0.183027	1.36282	-0.314163	-0.373823	-0.323672	-0.139109	-2.06735	0.499543
OAS2_0085	Nondemented	0.0659345	-4.6101	0.121296	0.276798	0.160017	0.104854	4.38216	-0.766798
OAS2_0086	Nondemented	-0.336508	-1.18407	-0.468338	-0.364679	-0.479494	-0.33428	-1.00402	-0.996603
OAS2_0087	Demented	-0.06095	0.374607	-0.028723	-0.0367845	-0.014001	-0.0324065	-0.460808	-0.412461
OAS2_0088	Demented	0.0877995	-0.0829455	0.168095	0.150458	0.138599	0.186918	0.195794	0.413162
OAS2_0089	Demented	0.073771	-0.20896	0.221191	0.212568	0.248235	0.072763	-0.459686	0.151473
OAS2_0090	Nondemented	-0.082494	-0.0868455	-0.106814	-0.183058	-0.160727	-0.049858	-5.34442	1.09947
OAS2_0094	Nondemented	-0.248378	-0.64446	-0.418847	-0.371981	-0.429488	-0.222775	-3.37654	-2.51486
OAS2_0095	Nondemented	0.0110475	0.411315	-0.08561	-0.121455	-0.060375	-0.0130685	-1.09563	-0.28043
OAS2_0096	Nondemented	0.08692	-0.172928	0.053097	0.0233865	0.0175285	0.1175	0.26595	-0.010085
OAS2_0098	Demented	0.102943	-2.83057	0.117847	0.06157	0.125152	0.137203	4.1132	1.18467
OAS2_0099	Demented	-0.002826	-0.436719	-0.075224	-0.0284985	-0.0689375	-0.024661	-1.33803	0.303021
OAS2_0101	Nondemented	-0.0386165	-0.23399	-0.014985	0.0328625	-0.074818	-0.0057325	-0.926652	1.77598
OAS2_0102	Demented	0.0449175	0.655617	0.165559	0.0273825	0.096088	0.005796	0.37376	-0.0285165
OAS2_0104	Demented	0.0298935	0.349058	0.049304	-0.08028	0.03028	0.0408695	-1.73822	0.416413
OAS2_0105	Nondemented	0.117416	-0.246245	0.23865	0.26348	0.281685	0.214875	2.21329	0.241425
OAS2_0106	Demented	0.136141	-1.64084	0.242571	0.21475	0.276599	0.127364	0.223377	0.094201
OAS2_0108	Demented	0.119154	0.08534	0.006198	0.196093	0.231469	0.190805	4.43222	-0.253778
OAS2_0109	Nondemented	-0.318991	-0.843375	-0.802864	-0.706373	-0.696686	-0.324678	-1.4646	-0.834923
OAS2_0111	Demented	0.0183605	0.0677185	0.072163	0.0009315	0.110799	0.11989	0.697606	0.947935
OAS2_0112	Demented	0.146365	1.84021	0.542878	0.452222	0.493407	-0.21082	-3.53012	-0.103017
OAS2_0113	Demented	0.332356	0.282552	0.643797	0.767625	0.680386	0.274249	2.05668	0.907171
OAS2_0114	Demented	-0.0377575	-0.788505	-0.0282705	-0.098975	-0.0915315	-0.030853	-2.23234	0.484013
OAS2_0116	Demented	-0.215148	-2.8832	-0.19359	-0.183758	-0.242381	-0.194589	-0.478045	-1.30645
OAS2_0117	Nondemented	-0.249634	-0.064235	-0.3239	-0.27464	-0.35052	-0.215091	-1.58986	0.751213
OAS2_0119	Nondemented	-0.216668	0.904192	-0.303731	-0.312259	-0.322748	-0.197855	0.534286	-0.947767
OAS2_0120	Demented	-0.549966	0.654005	-1.71376	-1.7714	-1.6918	-0.828604	-1.79882	-1.51225
OAS2_0121	Nondemented	0.0306255	0.420721	-0.1605	-0.1392	-0.032391	-0.0426425	0.34662	-0.420758
OAS2_0122	Nondemented	-0.162781	2.11647	-0.42158	-0.445288	-0.412377	-0.162067	0.263571	-0.444802
OAS2_0124	Demented	0.229498	0.8117	0.403091	0.354698	0.322331	0.238946	-1.7995	0.625863
OAS2_0126	Nondemented	-0.118218	-0.522743	-0.236291	-0.208555	-0.220561	-0.094856	-0.734112	-0.734927
OAS2_0129	Nondemented	0.0080685	0.651836	0.0595125	0.0600745	0.049047	-0.0504415	0.0057085	0.139356
OAS2_0134	Demented	-0.023515	-1.11702	0.0651615	0.0230865	-0.004163	-0.054166	0.772539	-0.008092
OAS2_0137	Demented	0.092462	0.0342285	0.143306	0.146455	0.070057	0.0662035	-0.570562	1.57649
OAS2_0138	Nondemented	0.135263	-1.50585	0.147797	0.172109	0.179997	0.210925	-0.450212	1.85436
OAS2_0139	Demented	0.0663815	0.147476	0.113337	0.216555	0.139494	0.073032	2.19261	0.859977
OAS2_0140	Demented	0.140495	-0.200474	0.33259	0.259037	0.200992	0.201557	-0.441228	-0.0833395
OAS2_0141	Nondemented	0.107075	1.24232	0.0829785	0.0222355	0.106204	0.074129	3.29416	0.573112
OAS2_0142	Nondemented	-0.035479	1.04991	0.067152	0.130138	0.0510495	0.0808925	3.36749	0.043105
OAS2_0143	Nondemented	0.111235	0.100924	0.33541	0.282555	0.27742	-0.61473	-0.381925	0.702546
OAS2_0146	Demented	0.230039	0.53396	0.273234	0.245618	0.271859	0.226378	-0.055933	0.514015
OAS2_0147	Nondemented	-0.039526	-0.087375	0.040344	0.0246175	0.03079	-0.0300025	-0.33496	0.692431
OAS2_0149	Nondemented	0.075163	-0.115591	0.117182	0.097349	0.01699	0.054575	-2.92919	-0.101561
OAS2_0150	Demented	-0.098547	0.81401	-0.295077	-0.228038	-0.25	-0.118269	0.159535	-0.98374
OAS2_0152	Nondemented	0.01733	-0.21593	-0.286363	0.175625	-0.215122	0.03432	-0.317068	-2.66051
OAS2_0154	Nondemented	-0.039885	0.804075	-0.110228	-0.14708	-0.217484	-0.0045705	-1.09138	0.603972
OAS2_0156	Nondemented	0.151344	0.25479	0.388604	0.418079	0.459855	0.12068	0.893979	0.0646565
OAS2_0157	Demented	-0.144243	-0.759853	-0.279481	-0.265155	-0.209509	-0.193661	0.238825	0.293223
OAS2_0159	Demented	0.122823	-1.58832	0.142457	0.0598565	0.0960645	0.127877	0.325521	-1.59619
OAS2_0160	Demented	0.153578	0.393622	0.360745	0.500482	0.293692	0.171721	0.32175	0.561207
OAS2_0161	Nondemented	0.093776	0.543299	0.300318	0.122932	0.074719	0.0347265	-0.03328	-1.08456
OAS2_0162	Demented	0.164524	1.73454	0.368365	0.25623	0.25795	0.0981295	-0.969866	1.09953
OAS2_0164	Demented	0.027321	-1.61764	0.139714	0.156722	0.151722	0.120314	-0.511602	0.154626
OAS2_0165	Demented	-0.38936	0.05419	-0.90388	-0.915605	-0.916495	-0.280336	-2.36362	-0.631655
OAS2_0169	Nondemented	-0.227698	-0.0364155	-0.338601	-0.411761	-0.412975	-0.125608	-0.5157	0.252065
OAS2_0171	Nondemented	-0.0599245	0.79112	0.0210345	-0.0381815	-0.078751	-0.0316565	-0.171704	-0.562123
OAS2_0174	Nondemented	-0.032716	0.479673	-0.0346205	-0.034614	0.042066	-0.019366	0.284216	0.320721
OAS2_0175	Demented	-0.08866	-0.049223	-0.085234	-0.059352	0.0087075	-0.0074075	-0.05447	-0.03459
OAS2_0177	Nondemented	-0.0007515	0.601884	-0.12091	0.014312	-0.0619855	-0.001207	-1.17492	1.26314
OAS2_0178	Nondemented	0.346883	0.471807	0.502572	0.459534	0.552538	0.323477	0.299318	0.206493
OAS2_0179	Demented	-0.454263	-0.40846	-1.03175	-1.06045	-0.982411	-0.321198	-1.39308	-1.01443
OAS2_0181	Demented	0.0573045	0.141219	0.0192085	0.109844	0.0420155	0.109948	0.307202	0.589971
OAS2_0182	Demented	-0.072888	-0.21911	-0.0437505	-0.142647	-0.134885	-0.0775055	0.064575	0.563279
OAS2_0183	Nondemented	-0.336952	-0.896597	-0.645563	-0.645376	-0.590862	-0.378005	-0.49974	-0.787876
OAS2_0184	Demented	0.038048	0.295709	0.053471	0.0047725	0.0084115	0.0269495	1.56608	-0.624394
OAS2_0185	Demented	-0.253456	-0.17776	-0.364281	-0.347297	-0.36971	-0.213771	1.32936	-0.141513
OAS2_0186	Nondemented	-0.018115	-1.3109	-0.0148165	0.0463975	0.052331	0.05781	-0.426791	-0.0496145

## Sheet: Fig3Oasis-AfterRegistration
		PBVC(%)
SubjectID	Demented-nondemented	None	Zscore	Fuzzy c-means	Gaussian Mixture model	Kernel density estimation	Histogram Matching	White stripe	RAVEL
OAS2_0002	Demented	-0.575769	-1.11789	-1.15879	-1.32263	-1.15854	-0.607532	-0.824859	-0.404045
OAS2_0004	Nondemented	0.554122	0.895886	0.934075	1.0392	0.930597	0.509514	0.646448	0.531377
OAS2_0005	Nondemented	-0.103216	-0.15562	-0.158613	-0.171688	-0.158148	-0.143455	-0.16393	-0.163185
OAS2_0007	Demented	0.426725	0.620065	0.620985	0.623215	0.623565	0.799812	0.536946	0.848136
OAS2_0008	Nondemented	0.301862	0.507904	0.516701	0.446196	0.517108	0.296661	0.408325	0.531938
OAS2_0009	Demented	0.171969	0.27501	0.293415	0.337146	0.297539	0.129963	0.224556	0.18552
OAS2_0010	Demented	0.159269	0.214768	0.200616	0.177301	0.198866	0.203518	0.18819	0.185997
OAS2_0012	Nondemented	0.0640385	0.0243045	0.029533	0.0361095	0.0290265	0.048664	0.048842	0.053041
OAS2_0013	Nondemented	0.0199935	-0.0157295	-0.0106135	-0.0301695	-0.0103045	0.0233365	0.019085	0.051697
OAS2_0014	Demented	0.125502	0.178268	0.1855	0.212786	0.184958	0.157354	0.15991	0.0800115
OAS2_0016	Demented	-0.0378845	-0.17959	-0.168951	-0.19144	-0.168856	-0.0186815	-0.118146	-0.044408
OAS2_0017	Nondemented	0.666268	1.59513	1.79143	2.21733	1.74962	-0.921816	1.00547	0.7753
OAS2_0022	Nondemented	-0.105404	-0.137046	-0.134754	-0.109441	-0.134052	-0.0820975	-0.130389	-0.148709
OAS2_0023	Demented	-0.118733	-0.267168	-0.18814	-0.206973	-0.196422	-0.222075	-0.204669	-0.116481
OAS2_0026	Demented	-0.0542715	-0.0877575	-0.0847285	-0.092017	-0.083876	-0.0110495	-0.085027	-0.037752
OAS2_0027	Nondemented	-0.250416	-0.388039	-0.388759	-0.403069	-0.389144	-0.228412	-0.308883	-0.20637
OAS2_0028	Demented	-0.09902	-0.140264	-0.146074	-0.13863	-0.145445	-0.0990735	-0.111899	-0.122123
OAS2_0030	Nondemented	-0.123576	-0.152491	-0.152827	-0.129941	-0.150939	-0.126355	-0.136082	-0.167797
OAS2_0032	Demented	-0.0780745	-0.121321	-0.131267	-0.130934	-0.135799	-0.121124	-0.0956995	-0.0929675
OAS2_0034	Nondemented	-0.03102	-0.091785	-0.088107	-0.126177	-0.087923	-0.022794	-0.075417	-0.0603295
OAS2_0035	Nondemented	0.140458	0.293107	0.29327	0.364588	0.293412	0.164482	0.214347	0.13567
OAS2_0036	Nondemented	-0.241213	-0.194752	-0.174792	-0.095969	-0.173392	-0.87929	-0.243862	-0.253227
OAS2_0039	Demented	-0.00548	0.0224385	0.0291695	0.0362135	0.029313	-0.0539845	0.00518	0.0120205
OAS2_0040	Demented	-0.256428	-0.394265	-0.376382	-0.319995	-0.373285	-0.338596	-0.360799	-0.431557
OAS2_0042	Nondemented	0.28214	0.377954	0.361436	0.401487	0.360065	0.275513	0.341142	0.323123
OAS2_0043	Demented	0.0012905	-0.0057405	0.0047205	0.0091672	0.005181	0.037323	-0.0021415	0.0225785
OAS2_0044	Demented	-0.057217	-0.0760305	-0.0716505	-0.0512565	-0.072941	0.005938	-0.0794275	-0.185538
OAS2_0045	Nondemented	0.102915	0.12829	0.133443	0.157012	0.13504	0.0695955	0.10556	0.118946
OAS2_0046	Demented	-0.0386905	-0.0642695	-0.062301	-0.0702796	-0.0620315	0.0452755	-0.057058	-0.046127
OAS2_0047	Nondemented	-0.108349	-0.334176	-0.385867	-0.523741	-0.384655	-0.0287785	-0.218297	0.045065
OAS2_0048	Demented	0.585684	1.11527	1.10795	1.17641	1.1071	-0.233992	0.875506	0.700887
OAS2_0049	Nondemented	1.01794	1.71147	1.77741	1.94772	1.77695	0.481277	1.3012	1.17378
OAS2_0050	Demented	0.129147	0.129953	0.130121	0.0754645	0.130292	0.301237	0.152418	0.286944
OAS2_0051	Nondemented	-0.022457	-0.0258061	-0.0127425	0.025144	-0.0133825	-0.0168865	-0.0358265	-0.0896095
OAS2_0053	Nondemented	0.0655215	0.0497825	0.0455025	-0.0199385	0.0427325	0.020243	0.0731665	0.165449
OAS2_0055	Nondemented	-0.0366775	-0.044084	-0.0436885	-0.058754	-0.0418935	-0.032079	-0.0384125	-0.0447165
OAS2_0056	Nondemented	0.15392	0.383329	0.454754	0.489227	0.451987	0.125762	0.2289	0.210733
OAS2_0057	Nondemented	-0.301085	-0.426867	-0.443673	-0.435845	-0.444364	-0.314388	-0.366891	-0.37704
OAS2_0058	Demented	-0.110775	-0.232119	-0.234947	-0.244722	-0.232664	-0.10788	-0.167114	-0.0166265
OAS2_0061	Nondemented	0.040987	0.015496	0.013623	0.011533	0.012365	0.056333	0.030385	0.0403895
OAS2_0062	Nondemented	-0.032061	-0.0450655	-0.04849	-0.053326	-0.0488235	-0.019872	-0.04647	-0.0108025
OAS2_0063	Demented	0.0179895	-0.041499	-0.059943	-0.107942	-0.061686	0.0797865	-0.007991	0.046426
OAS2_0064	Demented	0.145819	0.272921	0.290075	0.289815	0.289953	0.0993485	0.217231	0.203906
OAS2_0066	Demented	0.020814	0.038217	0.0359025	0.037271	0.0369755	0.0562935	0.031033	-0.011312
OAS2_0067	Nondemented	0.539728	1.09732	1.10924	1.18704	1.10697	-0.539696	0.858038	0.867767
OAS2_0068	Nondemented	0.044429	0.061132	0.0677355	0.0660541	0.062663	0.035375	0.0569045	0.064492
OAS2_0069	Nondemented	0.0940847	0.176346	0.171934	0.159349	0.172109	0.126936	0.151658	0.150383
OAS2_0070	Nondemented	-0.019605	0.034635	0.049465	0.01512	0.05049	0.01601	-0.010555	0.00693
OAS2_0071	Demented	-0.082189	-0.10824	-0.109296	-0.0798165	-0.108917	-0.114461	-0.103136	-0.127901
OAS2_0073	Nondemented	-0.065651	0.07442	0.10673	0.185663	0.105655	-1.14991	-0.022701	0.02267
OAS2_0075	Demented	0.107501	0.137641	0.129061	0.12484	0.129068	0.189459	0.131596	0.165814
OAS2_0076	Nondemented	-0.0292575	-0.0742085	-0.076085	-0.0642915	-0.073576	0.064584	-0.05053	-0.032553
OAS2_0078	Nondemented	-0.135958	-0.345191	-0.346964	-0.428895	-0.348742	-0.0636185	-0.248436	-0.16287
OAS2_0079	Demented	0.045649	0.0515375	0.048377	0.0707812	0.0502295	0.0924925	0.052208	0.0075845
OAS2_0080	Demented	0.497804	1.01108	1.07932	1.1132	1.0672	0.423243	0.771038	0.676761
OAS2_0081	Demented	-0.183027	-0.352827	-0.352855	-0.4176	-0.352337	-0.0346545	-0.280672	-0.147114
OAS2_0085	Nondemented	0.0659345	0.150287	0.144821	0.210722	0.146963	0.065926	0.093784	0.0378615
OAS2_0086	Nondemented	-0.336508	-0.453728	-0.455817	-0.420917	-0.454962	-0.350651	-0.408973	-0.459749
OAS2_0087	Demented	-0.06095	-0.149944	-0.1505	-0.147946	-0.147471	-0.050441	-0.112522	-0.096474
OAS2_0088	Demented	0.0877995	0.202781	0.182996	0.177815	0.182367	0.183913	0.151931	0.157401
OAS2_0089	Demented	0.073771	0.237617	0.231458	0.304547	0.230886	0.0576275	0.139185	0.0486265
OAS2_0090	Nondemented	-0.082494	-0.145137	-0.125575	-0.169183	-0.128232	-0.053698	-0.099235	-0.061987
OAS2_0094	Nondemented	-0.248378	-0.391215	-0.395977	-0.359616	-0.393674	-0.232881	-0.329112	-0.294863
OAS2_0095	Nondemented	0.0110475	-0.047995	-0.0964	-0.078549	-0.09543	0.006174	-0.02318	0.084475
OAS2_0096	Nondemented	0.08692	0.031328	0.020325	0.0138698	0.0181125	0.118263	0.0717365	0.094793
OAS2_0098	Demented	0.102943	0.091028	0.101515	0.103277	0.100262	0.104239	0.102117	0.139518
OAS2_0099	Demented	-0.002826	-0.012877	-0.009607	-0.0278715	-0.009685	-0.0444955	-0.01115	0.053928
OAS2_0101	Nondemented	-0.0386165	-0.0492445	-0.0476725	-0.0542375	-0.048176	-0.020864	-0.048588	-0.073307
OAS2_0102	Demented	0.0449175	0.035237	0.0162485	0.0039735	0.0167755	-0.01269	0.03857	0.076734
OAS2_0104	Demented	0.0298935	-0.001827	-0.0034225	-0.0160935	-0.002627	0.100177	0.0095505	0.0492155
OAS2_0105	Nondemented	0.117416	0.27207	0.22864	0.20081	0.230585	0.197546	0.217808	0.281205
OAS2_0106	Demented	0.136141	0.27149	0.275538	0.324721	0.274243	0.16371	0.2062	0.14051
OAS2_0108	Demented	0.119154	0.165788	0.166802	0.186139	0.166759	0.101319	0.137383	0.132933
OAS2_0109	Nondemented	-0.318991	-0.763444	-0.802945	-0.870362	-0.802772	-0.235096	-0.548432	-0.377335
OAS2_0111	Demented	0.0183605	0.047937	0.0524685	0.0283515	0.0525705	0.059797	0.02115	0.142833
OAS2_0112	Demented	0.146365	0.448953	0.505472	0.613469	0.503999	-0.459936	0.286774	0.291206
OAS2_0113	Demented	0.332356	0.706403	0.75051	0.838746	0.750409	0.225885	0.497878	0.445124
OAS2_0114	Demented	-0.0377575	-0.051454	-0.051263	-0.0835645	-0.052034	-0.0944145	-0.0542625	0.0858295
OAS2_0116	Demented	-0.215148	-0.218756	-0.226775	-0.117565	-0.224082	-0.199616	-0.216197	-0.481845
OAS2_0117	Nondemented	-0.249634	-0.34383	-0.323905	-0.272415	-0.32004	-0.233719	-0.298301	-0.339525
OAS2_0119	Nondemented	-0.216668	-0.327985	-0.356565	-0.318126	-0.356425	-0.200701	-0.290628	-0.242197
OAS2_0120	Demented	-0.549966	-1.50501	-1.70523	-2.00016	-1.70687	-0.81489	-0.932741	-0.584615
OAS2_0121	Nondemented	0.0306255	0.050563	0.04346	0.0350338	0.0447305	-0.0531325	0.04061	0.058988
OAS2_0122	Nondemented	-0.162781	-0.277054	-0.305582	-0.263754	-0.3037	-0.21318	-0.20177	-0.385649
OAS2_0124	Demented	0.229498	0.321958	0.319744	0.323284	0.317659	0.236226	0.273133	0.292836
OAS2_0126	Nondemented	-0.118218	-0.181673	-0.181925	-0.196905	-0.182409	-0.074845	-0.149911	-0.139177
OAS2_0129	Nondemented	0.0080685	0.0166445	0.019734	-0.0153417	0.0195235	-0.0719219	0.026596	0.0801695
OAS2_0134	Demented	-0.023515	0.003766	0.018165	-0.014305	0.018097	-0.047536	-0.0272795	-0.0076405
OAS2_0137	Demented	0.092462	0.0979205	0.11893	0.059747	0.120562	0.0951025	0.094033	0.23808
OAS2_0138	Nondemented	0.135263	0.176813	0.152337	0.0820145	0.152577	0.165417	0.163119	0.171899
OAS2_0139	Demented	0.0663815	0.0804105	0.0637865	0.0782573	0.0625235	0.0761835	0.082176	0.034879
OAS2_0140	Demented	0.140495	0.25298	0.257744	0.228895	0.258093	0.162586	0.207913	0.282873
OAS2_0141	Nondemented	0.107075	0.142773	0.152173	0.140193	0.151282	0.0375055	0.133073	0.126809
OAS2_0142	Nondemented	-0.035479	-0.058936	-0.05498	-0.073628	-0.056825	-0.028514	-0.0415175	-0.0313015
OAS2_0143	Nondemented	0.111235	0.34335	0.37271	0.401525	0.371675	-0.837464	0.209285	0.1646
OAS2_0146	Demented	0.230039	0.347764	0.332854	0.282026	0.334294	0.206663	0.31796	0.399448
OAS2_0147	Nondemented	-0.039526	-0.0595205	-0.0504415	-0.0464015	-0.0529165	-0.024749	-0.0497005	-0.059772
OAS2_0149	Nondemented	0.075163	0.077893	0.0831535	0.0663731	0.082936	0.099303	0.0776375	0.084128
OAS2_0150	Demented	-0.098547	-0.181117	-0.18633	-0.238317	-0.186274	-0.158015	-0.13164	-0.129758
OAS2_0152	Nondemented	0.01733	0.03775	0.0685	0.028915	0.07316	0.00366	-0.017085	0.068
OAS2_0154	Nondemented	-0.039885	-0.13435	-0.146135	-0.198598	-0.145186	-0.016914	-0.0875175	-0.0635045
OAS2_0156	Nondemented	0.151344	0.334102	0.372805	0.369441	0.373369	0.0856105	0.21572	0.164281
OAS2_0157	Demented	-0.144243	-0.268117	-0.265472	-0.328881	-0.264907	-0.197741	-0.22807	-0.20665
OAS2_0159	Demented	0.122823	0.147745	0.142842	0.169565	0.141313	0.103627	0.118665	0.0879025
OAS2_0160	Demented	0.153578	0.303217	0.306965	0.285826	0.307178	0.168183	0.242273	0.132826
OAS2_0161	Nondemented	0.093776	0.140358	0.147204	0.193073	0.147579	0.055276	0.118938	-0.041975
OAS2_0162	Demented	0.164524	0.25848	0.266625	0.205405	0.266185	0.146794	0.231145	0.29105
OAS2_0164	Demented	0.027321	0.055413	0.0650015	0.101667	0.063679	0.0867835	0.030203	0.0357115
OAS2_0165	Demented	-0.38936	-0.936185	-0.957165	-1.07005	-0.957845	-0.305293	-0.707005	-0.47457
OAS2_0169	Nondemented	-0.227698	-0.375451	-0.369699	-0.422833	-0.368609	-0.120192	-0.309778	-0.235793
OAS2_0171	Nondemented	-0.0599245	-0.068785	-0.0846255	-0.027027	-0.084348	-0.0942875	-0.0621335	-0.201916
OAS2_0174	Nondemented	-0.032716	-0.006961	-0.011154	-0.0213875	-0.011444	-0.0164855	-0.0115325	-0.0363195
OAS2_0175	Demented	-0.08866	-0.129534	-0.125181	-0.0946375	-0.125064	0.004763	-0.112485	-0.11452
OAS2_0177	Nondemented	-0.0007515	-0.03607	-0.053341	-0.027535	-0.0529195	0.004528	-0.003762	0.024074
OAS2_0178	Nondemented	0.346883	0.500406	0.523056	0.49577	0.52218	0.359487	0.432212	0.559654
OAS2_0179	Demented	-0.454263	-1.04881	-1.08095	-1.15633	-1.0807	-0.391284	-0.724773	-0.620804
OAS2_0181	Demented	0.0573045	0.0536485	0.071032	0.0549697	0.072118	0.070689	0.0607545	0.074515
OAS2_0182	Demented	-0.072888	-0.0948045	-0.0996965	-0.0841608	-0.099235	-0.15552	-0.083025	-0.0746135
OAS2_0183	Nondemented	-0.336952	-0.570187	-0.588579	-0.636085	-0.588746	-0.421909	-0.432497	-0.458442
OAS2_0184	Demented	0.038048	0.0782305	0.065985	0.0809501	0.0654265	0.0530335	0.057476	0.05591
OAS2_0185	Demented	-0.253456	-0.406691	-0.406808	-0.422819	-0.409001	-0.220326	-0.348709	-0.267439
OAS2_0186	Nondemented	-0.018115	-0.0450415	-0.0460485	-0.063629	-0.0465475	0.0475525	-0.023434	-0.023622

## Sheet: Fig2aOasis-BeforeRegistration
		Kullback Leibler Divergence
SubjectID	Demented-nondemented	None	Zscore	Fuzzy c-means	Gaussian Mixture model	Kernel density estimation	Histogram Matching	White stripe	RAVEL
OAS2_0002	Demented	0.108925	0.000893417	0	3.48117e-05	0	0.00224968	0.0460037	0.0693544
OAS2_0004	Nondemented	0.947671	0.000102533	1.27925e-05	9.7971e-08	0.00126103	0.000280396	0.00177	0.0508858
OAS2_0005	Nondemented	0.00188297	7.31397e-05	9.12193e-07	8.0628e-08	7.51687e-07	0.00172597	0.00541741	1.0135
OAS2_0007	Demented	0.144663	0.0195078	0.00043563	0.00244503	0.00284366	0.00554359	0.0190486	0.699004
OAS2_0008	Nondemented	0.00644905	0.00237837	4.45163e-06	2.00217e-06	0.000525687	0.00153013	0.0216044	0.0682694
OAS2_0009	Demented	0.0163707	0.000861741	1.3836e-06	4.63317e-07	0.000788461	0.00238386	0.133402	0.31297
OAS2_0010	Demented	0.00245397	0.000587569	2.13373e-06	1.73646e-08	0.000349395	0.00137824	0.00113706	0.25611
OAS2_0012	Nondemented	0.00641644	0.000209507	2.758e-06	2.41523e-05	0.00105168	0.000904221	0.00766119	0.00277061
OAS2_0013	Nondemented	0.00502397	0.000262845	7.13973e-05	0.000275615	2.5052e-06	0.00165591	0.00213165	0.0460062
OAS2_0014	Demented	0.784034	0.00106147	4.98247e-06	4.18105e-07	0.000384254	0.000379056	0.00276665	0.691057
OAS2_0016	Demented	0.00186014	0.00162209	8.15608e-06	7.35929e-06	0.000287151	0.0012747	0.0586567	0.129593
OAS2_0017	Nondemented	0.00695443	0.00212442	6.54067e-07	9.16024e-06	0.0705573	0.00156474	0.679852	0.0187527
OAS2_0022	Nondemented	0.00382267	2.86585e-05	1.02491e-05	9.6132e-06	1.47687e-06	0.00173743	0.00924079	0.162777
OAS2_0023	Demented	0.0112951	0.00569531	0.000501735	0.000556168	0.00208178	0.00141925	0.0272445	1.31041
OAS2_0026	Demented	0.00191955	0.000238627	2.64271e-06	1.20053e-06	9.55451e-07	0.00142415	0.00407875	0.103703
OAS2_0027	Nondemented	0.0254659	0.000661405	4.38278e-06	2.36485e-06	6.40071e-08	0.00108094	0.00415539	0.0113972
OAS2_0028	Demented	0.106057	5.87736e-05	9.59765e-06	1.12475e-05	1.86045e-05	0.000746534	0.00309936	0.468781
OAS2_0030	Nondemented	0.00133596	0.00115846	1.60048e-06	1.07891e-05	0.000894763	0.000960495	0.00876915	0.0183935
OAS2_0032	Demented	0.00539758	0.0187807	0.00136304	0.0195571	0.00138867	0.00304827	0.013858	0.721201
OAS2_0034	Nondemented	0.00194785	0.000239863	2.35698e-06	2.70045e-06	2.2983e-06	0.00172568	0.00261199	0.128617
OAS2_0035	Nondemented	0.00375439	0.000972883	2.07085e-06	0.000441585	0.00655268	0.0018593	0.150146	0.143711
OAS2_0036	Nondemented	0.00322377	0.000646007	4.78967e-05	9.21461e-05	0.00227475	0.00241158	0.178533	0.381083
OAS2_0039	Demented	0.00340961	0.000515487	1.87247e-05	1.99112e-05	0.0869716	0.00123553	1.13199	0.229405
OAS2_0040	Demented	0.0489155	0.0109014	0.00126479	0.00210835	0.0894863	0.00205453	0.111483	0.0334448
OAS2_0042	Nondemented	0.00171055	3.8098e-05	0	6.21539e-06	0	0.00119209	0.00581918	0.106108
OAS2_0043	Demented	0.00221482	0.000255365	0	1.04223e-06	0	0.00209595	0.00282484	0.00108414
OAS2_0044	Demented	0.00878503	0.00217903	2.52822e-05	9.18089e-05	0.00197824	0.00276941	0.0790012	0.00516002
OAS2_0045	Nondemented	0.0109236	0.00037368	7.84679e-06	5.3078e-06	0	0.00128501	0.00518841	0.0988807
OAS2_0046	Demented	0.0683572	6.25131e-05	1.40096e-06	1.65028e-07	8.87918e-06	0.00105832	0.00168844	0.00387174
OAS2_0047	Nondemented	0.00904631	0.000399617	1.53262e-05	1.30243e-06	0.000504174	0.00121239	0.0120874	0.121052
OAS2_0048	Demented	0.0019633	0.00196417	0	5.37693e-05	0.00185998	0.0014047	0.052988	0.412558
OAS2_0049	Nondemented	0.0437015	0.000415837	0.000341233	0.000208699	0.000568041	0.00187429	0.117375	0.673006
OAS2_0050	Demented	0.0106746	0.0027634	9.32292e-05	0.000152643	0.000113366	0.00102878	0.00923825	0.0550537
OAS2_0051	Nondemented	0.00296376	0.00017014	4.52065e-07	7.35801e-07	0.00119909	0.0010192	0.0348556	0.0453389
OAS2_0053	Nondemented	0.149422	0.000763057	0	0	0	0.00147227	0.00405845	0.213846
OAS2_0055	Nondemented	0.00234205	5.87684e-05	6.66873e-06	6.10503e-06	3.74803e-06	0.00191916	0.0253568	0.0830455
OAS2_0056	Nondemented	0.380498	0.00017726	3.05254e-05	1.86471e-05	0.000701277	0.00214051	0.0814319	0.0477112
OAS2_0057	Nondemented	0.313119	0.000275569	1.40274e-06	1.89089e-07	1.22708e-05	0.00864032	0.00822662	0.308057
OAS2_0058	Demented	0.00859402	0.000300469	3.03001e-05	3.95211e-07	0.108892	0.00243537	1.29253	0.00457038
OAS2_0061	Nondemented	0.00294269	5.09999e-05	5.02283e-10	9.3717e-05	0.000877294	0.00112118	0.0106182	0.221108
OAS2_0062	Nondemented	0.00258426	0.00264896	5.5812e-08	1.63258e-07	0.00241388	0.00131181	0.0815077	1.02363
OAS2_0063	Demented	0.00608192	0.000397313	0.000222786	8.22382e-06	0.00763041	0.0014062	0.110963	0.141801
OAS2_0064	Demented	0.00273608	0.000526108	0	0	0.0676186	0.00177879	0.930253	0.123572
OAS2_0066	Demented	0.0191385	0.00392873	0.000136519	0.000237457	0.00266502	0.00165822	0.059367	0.105066
OAS2_0067	Nondemented	0.0158114	0.00365005	4.28578e-05	0.00011445	0.00313858	0.00268044	0.240073	0.154164
OAS2_0068	Nondemented	0.00296161	0.000154739	1.27887e-05	1.39119e-05	0.0400634	0.00137954	0.935962	0.804577
OAS2_0069	Nondemented	0.00235508	0.00010664	0	0	0	0.00121791	0.00367804	0.236872
OAS2_0070	Nondemented	0.065629	0.0108446	3.69045e-05	0.000128632	1.19518e-07	0.0024587	0.0265021	0.0276933
OAS2_0071	Demented	0.00216353	6.41145e-05	0	0	0	0.00071836	0.0045297	0.395987
OAS2_0073	Nondemented	0.00211989	0.000503018	1.79308e-06	2.6684e-06	5.8107e-06	0.00169845	0.00361858	0.096821
OAS2_0075	Demented	0.00200661	0.00042394	1.17814e-05	4.21429e-05	0.00153788	0.00114682	0.0261856	0.00239597
OAS2_0076	Nondemented	0.028838	0.00221388	1.51461e-05	5.32838e-07	0.000646805	0.00210324	0.0967844	0.0177824
OAS2_0078	Nondemented	0.013308	0.000380337	0	1.31503e-05	0	0.00101489	0.000445645	0.424217
OAS2_0079	Demented	0.179708	0.000211174	2.25512e-05	2.37345e-05	1.86305e-05	0.00306411	0.014934	0.189225
OAS2_0080	Demented	0.0913739	0.0748828	0.00504367	0.00530925	0.00495634	0.0876869	0.426122	0.370004
OAS2_0081	Demented	0.0167345	0.000149604	0	0	0	0.00082171	0.00231736	1.11097
OAS2_0085	Nondemented	0.00894286	0.000473039	4.69749e-07	1.3421e-06	0.000254855	0.00071794	0.00774208	0.124876
OAS2_0086	Nondemented	0.0118389	0.000401479	2.63553e-06	2.41311e-05	0.000653436	0.00132619	0.0203798	0.0239602
OAS2_0087	Demented	0.00380822	0.000571301	0	0	0.00116789	0.00144924	0.0256381	0.367448
OAS2_0088	Demented	0.0105721	0.00038574	1.52819e-06	1.79795e-07	1.82701e-06	0.00125352	0.00407672	0.0039186
OAS2_0089	Demented	0.0169706	0.00119242	0.000120832	0.000270896	0.010898	0.00216236	0.288624	0.138464
OAS2_0090	Nondemented	0.0585088	0.00126887	0	0	0	0.00140608	0.0401839	0.859927
OAS2_0094	Nondemented	0.0303413	0.00161179	6.81104e-05	6.9684e-05	0.000606558	0.00161433	0.0357506	0.0564984
OAS2_0095	Nondemented	0.0282382	0.000138957	0	0	0	0.00110094	0.0184831	0.277777
OAS2_0096	Nondemented	0.0137448	0.0020652	2.9942e-06	2.39182e-05	0.000619371	0.00114736	0.0232574	0.271332
OAS2_0098	Demented	0.111967	0.000110317	3.66042e-06	3.76364e-06	6.86579e-06	0.00110114	0.00874947	0.0075767
OAS2_0099	Demented	0.00214025	0.000920474	9.93981e-07	1.01897e-06	0.00147381	0.00159017	0.109193	0.524037
OAS2_0101	Nondemented	0.032601	0.00099998	3.91854e-05	1.92808e-05	0.000985541	0.00189274	0.0219594	0.0817053
OAS2_0102	Demented	0.0069969	0.000349173	3.15947e-06	1.47425e-05	8.12652e-08	0.00108014	0.00627034	0.0788102
OAS2_0104	Demented	0.00109086	0.000291153	1.18691e-05	8.89909e-06	5.78929e-07	0.00112163	0.00200781	0.00206809
OAS2_0105	Nondemented	0.0170722	0.0033622	1.43589e-05	0.000104961	0.00141723	0.00278091	0.0177722	0.813354
OAS2_0106	Demented	0.00661076	0.00344719	2.07373e-06	7.78225e-05	0.000194363	0.00094604	0.0146264	0.0138398
OAS2_0108	Demented	0.013514	0.00339386	2.95536e-05	0.000381396	0.00230722	0.00148277	0.0101328	0.996386
OAS2_0109	Nondemented	0.0180399	3.80137e-05	1.80275e-05	5.92519e-05	9.43337e-06	0.00112736	0.00181483	0.115143
OAS2_0111	Demented	0.0195628	0.00139562	0.000206081	0.00024587	0.000337118	0.00113965	0.0281462	0.0912152
OAS2_0112	Demented	0.00440377	0.00104789	4.54413e-06	4.04719e-06	0.0884277	0.00229079	1.38609	0.0772013
OAS2_0113	Demented	0.00250666	5.93024e-05	5.5305e-05	2.67484e-05	0.000484147	0.0018255	0.0220182	0.0503196
OAS2_0114	Demented	0.035705	0.00251395	0.000442851	0.000737356	0.0653886	0.00143769	0.737562	0.894383
OAS2_0116	Demented	0.00387665	0.00245914	0	3.74206e-06	0.0513194	0.00125104	0.99244	0.011102
OAS2_0117	Nondemented	0.00307714	0.000790983	5.93514e-05	8.32423e-05	0.000748696	0.00182439	0.0234788	0.0235484
OAS2_0119	Nondemented	0.0260958	0.0002063	9.32284e-06	9.74965e-06	8.52074e-06	0.0014155	0.00393542	0.262795
OAS2_0120	Demented	0.014407	0.00131836	2.65958e-05	0.000143703	6.12096e-05	0.00142524	0.00545644	0.179235
OAS2_0121	Nondemented	0.00128298	0.000329158	0	0	0	0.000863232	0.00299461	0.0695121
OAS2_0122	Nondemented	0.00352479	0.000937797	6.26224e-10	1.72597e-06	2.42629e-06	0.00191789	0.0276801	0.0838364
OAS2_0124	Demented	0.0156175	0.000277441	1.33558e-05	1.51812e-05	2.12969e-05	0.00129311	0.003274	0.748894
OAS2_0126	Nondemented	0.0271972	5.77991e-05	0	0	0	0.00106604	0.000770767	0.250371
OAS2_0129	Nondemented	0.0218539	0.000396094	8.07608e-06	1.92006e-05	0.000190458	0.00214237	0.00903899	0.00461009
OAS2_0134	Demented	0.00261188	0.00104113	6.72508e-05	9.55457e-05	0.000719697	0.00455568	0.0385022	0.215493
OAS2_0137	Demented	0.909819	0.00160879	9.64182e-05	8.53027e-05	0.000821958	0.000484899	0.0154327	0.0151967
OAS2_0138	Nondemented	0.00399486	0.000919724	3.84939e-05	3.41942e-06	0.00365916	0.00146364	0.0683502	0.00808274
OAS2_0139	Demented	0.0014447	7.84253e-05	7.25587e-06	8.505e-06	6.58338e-06	0.000926973	0.00124342	0.114396
OAS2_0140	Demented	0.195222	0.00061323	0	1.25561e-07	0.000508079	0.00111444	0.017538	0.281992
OAS2_0141	Nondemented	0.0269948	0.00101018	1.49363e-07	1.05925e-06	0.000147035	0.00186227	0.0076905	0.653664
OAS2_0142	Nondemented	0.00232317	0.000980793	0	0	0	0.000737159	0.0215951	0.161151
OAS2_0143	Nondemented	0.00774759	0.00118096	1.66626e-05	1.64055e-05	0.000823346	0.00128133	0.0660598	0.579959
OAS2_0146	Demented	0.00371697	0.000566013	0.00012291	0.000468959	0.000545533	0.00209035	0.00831503	0.231893
OAS2_0147	Nondemented	0.00444679	4.43565e-05	0	7.72777e-05	0	0.0014324	0.00637767	0.0116055
OAS2_0149	Nondemented	0.0170343	0.000159011	4.1886e-05	0.000139332	0.000314509	0.00120363	0.00154762	0.00558786
OAS2_0150	Demented	0.132268	0.000225886	0	3.05427e-09	0	0.000788707	0.0436934	1.02856
OAS2_0152	Nondemented	0.00515299	0.000615919	3.97382e-05	4.24083e-05	0.000481945	0.00229574	0.106073	0.0186199
OAS2_0154	Nondemented	0.197334	0.294345	0.00320263	0.00446967	0.000233429	0.0136966	0.659286	0.584186
OAS2_0156	Nondemented	0.00289905	0.00210682	0.000111649	0.000214448	0.000672593	0.00102609	0.0547268	0.0830126
OAS2_0157	Demented	0.0370208	0.000202656	0	0	0	0.00396132	0.0603714	0.127988
OAS2_0159	Demented	0.00472413	0.000952737	1.19876e-05	2.55429e-05	6.40466e-06	0.00124615	0.0388746	0.10645
OAS2_0160	Demented	0.226424	0.000363968	5.72887e-08	6.72996e-06	0.0265061	0.00117336	2.38839	0.294779
OAS2_0161	Nondemented	0.00317299	0.000248414	1.26727e-08	3.99908e-06	2.25314e-07	0.000992504	0.00098329	0.0367455
OAS2_0162	Demented	0.87009	0.00274302	8.9946e-07	8.55392e-06	0.00012442	0.00171192	0.0565982	0.472351
OAS2_0164	Demented	0.0399981	6.36106e-05	2.64523e-06	1.24119e-05	0.000252626	0.00237864	0.0136992	0.560367
OAS2_0165	Demented	0.00266243	0.000385387	1.11679e-05	1.37319e-05	0.0440644	0.00116241	0.87232	0.141481
OAS2_0169	Nondemented	0.0344863	3.39767e-05	1.29863e-05	2.09676e-07	1.748e-06	0.00106185	0.00166335	0.27774
OAS2_0171	Nondemented	0.00149496	0.00116425	0	5.07757e-06	0.000623145	0.000960527	0.0162891	0.288121
OAS2_0174	Nondemented	0.0105984	0.000674098	5.17919e-06	4.76338e-06	1.28856e-06	0.00139788	0.100228	0.00637813
OAS2_0175	Demented	0.016176	0.00121137	1.60698e-05	1.78013e-05	6.11521e-05	0.00115855	0.00486957	0.018145
OAS2_0177	Nondemented	0.00219594	0.000613585	6.84533e-08	9.01782e-05	5.72099e-08	0.00200674	0.0133647	0.00737437
OAS2_0178	Nondemented	0.00510576	0.00029357	2.55398e-05	6.46254e-05	0.000324762	0.00124737	0.00144713	0.0903764
OAS2_0179	Demented	0.00175514	0.000781965	0.00018519	0.000249397	0.000431983	0.00105532	0.0781446	0.35223
OAS2_0181	Demented	0.0519247	0.00455352	0.000265829	0.000274024	0.000277076	0.00250806	0.0651077	0.694417
OAS2_0182	Demented	0.0075003	0.000185134	1.9752e-05	0.000142517	0.00117258	0.0013591	0.00701947	0.25919
OAS2_0183	Nondemented	0.01072	0.00149622	4.35648e-06	9.73977e-05	0.00019928	0.00172274	0.0357067	0.11729
OAS2_0184	Demented	0.0261303	3.16677e-05	2.55405e-07	3.7728e-07	1.03103e-08	0.00144914	0.00546854	0.189656
OAS2_0185	Demented	0.0147988	0.000151763	0	0.000142199	0.0313427	0.00158848	0.645572	0.518003
OAS2_0186	Nondemented	0.00135363	5.24204e-05	0	5.84959e-08	0	0.00111468	0.00159621	0.00119518

## Sheet: Fig2bADNI-BeforeRegistration
		Kullback Leibler Divergence
SubjectID	CN-AD	None	Zscore	Fuzzy c-means	Gaussian Mixture model	Kernel density estimation	Histogram Matching	White stripe	RAVEL
129_4371	CN	0.807264	0.102105	0.00222404	0	0.00179477	0.0155021	0.122226	error
130_4660	AD	0.00131933	0.000491836	6.60864e-05	4.55223e-05	0.0146347	error	0.12148	0.0284688
002_4262	CN	0.519729	7.02407e-05	0	0	0	0.000373248	0.00754534	1.33816
137_4258	AD	0.0108623	0.0119518	0	0	0	0.00190816	0.0696948	0.316217
003_4288	CN	0.0389799	0.00514902	8.5864e-05	8.5033e-05	8.6695e-05	0.192839	0.120037	error
006_4192	AD	0.00222852	1.12563e-05	0	0	0	0.00087337	0.00821513	0.00977089
035_4464	CN	0.203174	0.0390746	0.00221942	0.00252304	0.00225452	0.00615314	0.0877941	0.173698
016_4009	AD	0.00250364	0.00152861	7.89281e-05	0.00335559	0.00103353	0.00140455	0.0173231	1.1778
130_4641	AD	0.00230426	0.000155061	1.58392e-05	1.07444e-05	0.000192734	0.000586097	0.0253583	0.35045
116_4625	AD	0.0255428	0.000800823	0	0	0	0.000370409	0.00587126	0.0206489
116_4483	CN	0.0992419	0.000119943	0	0	0	0.00300426	0.00611124	0.238191
023_4448	CN	0.117575	0.000144627	0	0	0	0.00012914	0.00849435	0.137026
098_4215	AD	0.0203167	0.000519073	1.44677e-06	2.01734e-06	0.00213308	0.00276739	0.0132368	0.790878
135_4657	AD	0.0311389	0.00131064	0	0	0	0.000401952	0.00169157	0.131186
941_4292	CN	0.0313251	7.97389e-05	0	0	0	0.00092517	0.00382718	0.0396336
009_4612	CN	0.0150724	0.00175629	0	0	0	0.00165149	0.0233605	0.19141
127_4500	AD	0.0381571	0.00655044	0.000172983	0.000254363	0.0269516	0.00920463	0.15104	0.483225
094_4089	AD	0.0512551	0.000111968	2.0327e-05	0.000187495	0.00971499	0.00217799	0.343237	0.462898
029_4384	CN	0.424887	0.00300544	3.76385e-07	4.16864e-07	1.20922e-07	0.00158772	0.00902841	0.0228587
126_4494	AD	0.0477236	0.000215428	1.09732e-05	0.000205315	2.10617e-05	0.00254479	0.00771492	0.201607
123_4526	AD	0.0277833	0.000161634	3.17411e-06	1.77861e-05	0.000291442	0.00138019	0.00242355	0.0206677
006_4153	AD	0.0290132	0.00137034	0	0	0	0.000363689	0.00492385	0.0287272
128_4832	CN	0.00187974	0.000282413	0	0	0	0.000271374	0.00395343	0.0741186
094_4560	CN	0.0114996	0.0041102	0	9.4746e-05	0	0.00122305	0.0117314	0.425608
016_4591	AD	0.00128714	0.00200782	0	0	0	0.000672922	0.004372	0.158381
023_4501	AD	0.00612198	4.47185e-05	5.71509e-07	1.28446e-05	0.00285026	0.000279654	0.0326155	0.75936
099_4104	CN	0.668693	0.00277801	0	0.000826741	5.01557e-06	0.00290408	0.00274218	error
135_4676	AD	0.00853499	6.64931e-05	6.48879e-08	7.17074e-08	9.66938e-05	0.000330126	0.00704035	0.163375
019_4477	AD	0.000688169	0.000330098	0	0	0	0.00286786	0.00281045	0.119678
137_4672	AD	0.0346341	7.6723e-05	4.9868e-08	4.26855e-06	1.73607e-05	0.000541859	0.00160942	0.598715
014_4039	AD	0.00934577	0.00352607	0.000193673	0.00230033	0.000205313	0.00166576	0.00690343	error
007_4516	CN	0.101967	0.00155881	3.02699e-06	2.90641e-06	3.22998e-06	0.000879819	0.00755746	1.48891
007_4568	AD	0.0299008	0.000529355	0.00169538	0.00237556	0.00471992	0.00187392	0.144579	0.223014
129_4422	CN	0.971942	0.000733905	0	0	0	0.00207933	0.00274797	error
053_4578	CN	0.00166468	0.000695138	0	0	0	0.000720308	0.00220722	0.0743293
153_4172	AD	0.00201277	0.00034819	0	0	0	0.000594447	0.00152293	0.0902833
129_4369	CN	0.92583	0.00412832	0.000190573	0.000189742	0.00018988	0.0209187	0.0162861	error
116_4195	AD	0.283247	0.00100079	0	0	0	0.000341462	0.000293271	1.29726
019_4252	AD	0.00115615	7.69544e-07	0	0	0	0.00110612	0.000844081	0.0265183
137_4211	AD	0.000435911	0.000231231	0	0	0	0.000193333	0.00254074	0.48239
094_4503	CN	0.0824574	0.333305	0.00225289	0.0205023	0.00212678	0.0098632	0.190108	0.26482
029_4585	CN	0.420764	0.0169412	0	0	0	0.00111646	0.00469734	0.237842
029_4385	CN	0.265569	0.0141389	0.000287242	6.92837e-05	0.000256218	0.00363408	0.0336142	0.0271671

## Sheet: Fig2cOasis-AfterRegistration
		Kullback Leibler Divergence
SubjectID	Demented-nondemented	None	Zscore	Fuzzy c-means	Gaussian Mixture model	Kernel density estimation	Histogram Matching	White stripe	RAVEL
OAS2_0002	Demented	0.108925	0.00154242	0.000124046	3.69203e-05	0	0.00284375	0.0543274	0.670133
OAS2_0004	Nondemented	0.947671	0.000251009	3.67675e-05	4.90057e-05	0.000169051	0.000137663	0.00339355	0.0290777
OAS2_0005	Nondemented	0.00188297	3.92459e-05	3.12614e-07	3.48687e-07	0.000151848	0.00123304	0.0182985	0.00626077
OAS2_0007	Demented	0.144663	0.0136125	0.000517405	0.00213477	0.00109781	0.00737296	0.117168	0.615736
OAS2_0008	Nondemented	0.00644905	0.00152126	2.44513e-06	5.1e-05	0.000163235	0.00150832	0.0136258	0.0220943
OAS2_0009	Demented	0.0163707	0.000473814	1.82247e-07	3.26316e-06	0.000205497	0.00186802	0.0848193	0.0223111
OAS2_0010	Demented	0.00245397	2.4914e-05	8.15594e-06	6.87606e-05	3.44952e-07	0.00206953	0.00787703	0.0147059
OAS2_0012	Nondemented	0.00641644	0.000904642	2.89572e-05	9.99774e-05	2.74855e-09	0.00218006	0.00473819	0.115026
OAS2_0013	Nondemented	0.00502397	0.000542248	8.37577e-05	0.00020382	0.000700729	0.00224696	0.0101192	0.0103683
OAS2_0014	Demented	0.784034	0.000258929	4.52133e-08	0.000123543	9.09578e-06	0.000350725	0.00566557	0.778259
OAS2_0016	Demented	0.00186014	0.00076348	1.33249e-06	1.27781e-05	0.000192558	0.00170186	0.0449232	0.012415
OAS2_0017	Nondemented	0.00695443	0.00146603	1.81595e-07	2.84352e-05	0.0795905	0.00194488	0.81388	0.0419379
OAS2_0022	Nondemented	0.00382267	2.8352e-05	9.18652e-06	9.74763e-06	6.1765e-06	0.00485415	0.0163202	0.0371727
OAS2_0023	Demented	0.0112951	0.00546212	0.000505619	0.000544171	0.000554164	0.00149197	0.00788803	1.28122
OAS2_0026	Demented	0.00191955	0.000577089	4.11458e-06	1.16544e-05	9.04258e-05	0.000668825	0.0104025	0.67039
OAS2_0027	Nondemented	0.0254659	0.00188679	5.26436e-06	7.99256e-05	1.94567e-05	0.000792712	0.0073704	0.00749085
OAS2_0028	Demented	0.106057	1.64523e-05	1.19972e-06	2.70309e-05	0.000201795	0.00104503	0.00144761	0.027548
OAS2_0030	Nondemented	0.00133596	0.000182382	3.24033e-06	8.67311e-06	0.000292753	0.00119854	0.00350609	0.00665598
OAS2_0032	Demented	0.00539758	0.0139795	0.00134906	0.00504385	0.00186619	0.00950151	0.013907	0.402788
OAS2_0034	Nondemented	0.00194785	0.000243233	9.13186e-07	1.11009e-05	1.11197e-05	0.00352528	0.0134421	0.840543
OAS2_0035	Nondemented	0.00375439	0.000534812	0.000147038	0.000428249	0.00274236	0.0016554	0.0373977	0.0258251
OAS2_0036	Nondemented	0.00322377	0.000214618	0.000111752	6.43552e-05	0.00184939	0.00554572	0.119639	0.0572793
OAS2_0039	Demented	0.00340961	0.00036556	1.79517e-05	1.94912e-05	1.24223e-05	0.00709365	1.36076	0.0649826
OAS2_0040	Demented	0.0489155	0.0103492	0.0012868	0.00167493	0.00193865	0.0141659	0.0742421	0.076397
OAS2_0042	Nondemented	0.00171055	9.81129e-05	0	1.75657e-06	0	0.00114654	0.00320857	0.0367168
OAS2_0043	Demented	0.00221482	7.00088e-05	3.0628e-06	1.43601e-05	0	0.00805488	0.00186133	0.00127045
OAS2_0044	Demented	0.00878503	0.00108091	1.47004e-05	0.000303456	0.00389904	0.00230312	0.135804	0.115818
OAS2_0045	Nondemented	0.0109236	0.000767274	9.37965e-06	4.46957e-05	0	0.00462235	0.00507736	0.00542248
OAS2_0046	Demented	0.0683572	6.98576e-05	3.30232e-06	2.59728e-05	5.26937e-07	0.00122831	0.000653524	0.0024192
OAS2_0047	Nondemented	0.00904631	0.000201698	2.44291e-05	3.68269e-07	0	0.000715939	0.00556648	0.0164836
OAS2_0048	Demented	0.0019633	0.000261244	5.47226e-05	5.00258e-06	0	0.00120238	0.0640241	0.0373956
OAS2_0049	Nondemented	0.0437015	4.7337e-05	0.000226739	0.000251365	0.000288436	0.00240114	0.227559	0.0124863
OAS2_0050	Demented	0.0106746	0.00176191	6.58622e-05	8.21153e-05	7.05999e-05	0.000907305	0.00727251	0.922918
OAS2_0051	Nondemented	0.00296376	6.15038e-05	1.81789e-07	1.60348e-06	0.00210958	0.00245707	0.0666181	0.123453
OAS2_0053	Nondemented	0.149422	0.000157595	0	6.11157e-07	0	0.00208448	0.00559233	0.0248705
OAS2_0055	Nondemented	0.00234205	4.50222e-05	6.06771e-06	6.06771e-06	4.60063e-06	0.00181554	0.0266443	0.00360791
OAS2_0056	Nondemented	0.380498	0.000214233	2.63863e-05	1.39225e-07	0.0014642	0.0036472	0.0973639	0.105053
OAS2_0057	Nondemented	0.313119	0.000246126	2.61518e-08	7.8893e-07	4.61219e-06	0.0183321	0.0114765	0.0604636
OAS2_0058	Demented	0.00859402	0.000648452	2.64462e-08	5.60998e-06	0.000154809	0.00318177	0.00545933	0.0466089
OAS2_0061	Nondemented	0.00294269	0.000259418	1.73134e-05	7.83501e-05	0.000877274	0.00116239	0.0088431	0.0953743
OAS2_0062	Nondemented	0.00258426	0.00163816	7.41242e-07	8.67873e-05	0.00275213	0.00118993	0.0869152	0.00469996
OAS2_0063	Demented	0.00608192	0.000110859	3.66548e-07	0.000273879	0.00124137	0.00164246	0.0250511	0.0257381
OAS2_0064	Demented	0.00273608	0.00199381	0	0	0.0655576	0.00390813	0.934032	0.0562391
OAS2_0066	Demented	0.0191385	0.00229279	0.0001818	0.000164187	0.00416755	0.000805782	0.065658	0.00828411
OAS2_0067	Nondemented	0.0158114	0.00123406	0.000110442	7.56666e-06	0.00269544	0.00239483	0.164122	0.966842
OAS2_0068	Nondemented	0.00296161	0.000158083	1.28083e-05	1.55127e-05	0.0735151	0.00165412	0.980651	0.775668
OAS2_0069	Nondemented	0.00235508	1.91418e-05	0	0	0	0.00503814	0.00385384	0.0804989
OAS2_0070	Nondemented	0.065629	0.00758973	4.47905e-05	0.000258779	1.78842e-05	0.00204144	0.038132	1.14674
OAS2_0071	Demented	0.00216353	1.04489e-05	0	0	0	0.000843773	0.00104289	0.0138504
OAS2_0073	Nondemented	0.00211989	0.000282547	2.64289e-08	1.38876e-05	0.000167211	0.00184054	0.0358079	0.0028924
OAS2_0075	Demented	0.00200661	0.000430697	9.53597e-07	2.84208e-05	0.000222378	0.00118134	0.0129895	0.00680434
OAS2_0076	Nondemented	0.028838	0.000681694	8.27968e-06	6.73909e-06	0.000352628	0.00307425	0.0616332	0.0422875
OAS2_0078	Nondemented	0.013308	4.759e-05	4.8021e-06	2.52655e-06	0	0.000978029	0.00627723	0.159728
OAS2_0079	Demented	0.179708	0.000232376	2.22739e-05	2.5381e-05	1.81332e-05	0.00330698	0.0277717	0.0779292
OAS2_0080	Demented	0.0913739	0.058067	0.00520257	0.00528163	0.00527661	0.00639857	0.296373	0.338233
OAS2_0081	Demented	0.0167345	0.000108001	0	6.42204e-06	0	0.000947107	0.00745552	0.0320387
OAS2_0085	Nondemented	0.00894286	0.000449316	1.34592e-06	8.49279e-07	0.000207002	0.000729205	0.00475926	0.0407388
OAS2_0086	Nondemented	0.0118389	0.000134702	5.58184e-07	5.14088e-06	0.000176362	0.00308689	0.0180699	0.00220531
OAS2_0087	Demented	0.00380822	0.000744702	0	0	0.00131979	0.00405273	0.00984114	0.064125
OAS2_0088	Demented	0.0105721	0.000173567	7.6976e-08	1.15701e-05	5.99255e-06	0.00126631	0.00753266	1.03655
OAS2_0089	Demented	0.0169706	0.00170275	0.00018351	0.000223709	0.00198241	0.00889563	0.101154	0.157847
OAS2_0090	Nondemented	0.0585088	0.00094117	0	0	0	0.00378281	0.0416545	0.00492139
OAS2_0094	Nondemented	0.0303413	0.00152698	5.50111e-05	1.81544e-06	0	0.00126432	0.0128792	0.0106081
OAS2_0095	Nondemented	0.0282382	0.000136831	0	6.39749e-05	0	0.00222328	0.014186	0.00973768
OAS2_0096	Nondemented	0.0137448	0.00170282	1.23616e-06	4.82855e-05	0	0.00197543	0.0318438	0.0152013
OAS2_0098	Demented	0.111967	0.000189477	4.31438e-06	2.98694e-06	8.68727e-06	0.00187108	0.0109759	0.00327881
OAS2_0099	Demented	0.00214025	0.00180827	2.56531e-06	6.94312e-07	0.00090638	0.00129583	0.03351	0.00669775
OAS2_0101	Nondemented	0.032601	0.000824671	2.20537e-05	2.31842e-05	0.00103848	0.00175487	0.027369	0.127732
OAS2_0102	Demented	0.0069969	0.000146176	1.60174e-05	6.99682e-06	0.0005977	0.00135499	0.0185669	0.0144798
OAS2_0104	Demented	0.00109086	0.000155065	7.93965e-06	1.29771e-07	6.69774e-05	0.00106671	0.0209177	0.00996375
OAS2_0105	Nondemented	0.0170722	0.00469546	3.65094e-05	0.000145278	4.67978e-06	0.00303995	0.0241572	0.373807
OAS2_0106	Demented	0.00661076	0.00199676	1.34569e-05	1.0409e-05	2.26606e-05	0.00110307	0.00890894	0.09984
OAS2_0108	Demented	0.013514	0.00143262	0.000141342	0.000330332	0.00203403	0.00160136	0.0333369	0.0881486
OAS2_0109	Nondemented	0.0180399	2.57604e-05	2.38325e-05	3.73204e-05	1.23651e-05	0.000909277	0.00503337	0.0261088
OAS2_0111	Demented	0.0195628	0.00120782	0.000222162	0.000265302	0.000252353	0.00420013	0.00663675	0.834176
OAS2_0112	Demented	0.00440377	0.000842649	3.61438e-06	4.4014e-06	0.0918812	0.0063536	0.32171	0.0348193
OAS2_0113	Demented	0.00250666	4.31526e-05	1.21386e-05	6.15924e-06	3.00454e-06	0.00243646	0.00226393	0.0793893
OAS2_0114	Demented	0.035705	0.00168282	0.000563221	0.00077471	0.00123049	0.00312077	0.0961179	0.562246
OAS2_0116	Demented	0.00387665	0.00127251	9.15538e-06	2.17533e-06	0.000122917	0.000723593	0.0282311	0.0218478
OAS2_0117	Nondemented	0.00307714	0.00116726	6.96006e-05	6.24483e-05	0.000272694	0.0032887	0.0281835	0.00820341
OAS2_0119	Nondemented	0.0260958	0.00011263	9.35938e-06	8.05458e-06	8.39387e-06	0.00129505	0.00413405	0.102392
OAS2_0120	Demented	0.014407	0.000887599	2.32598e-05	0.000242407	2.21358e-06	0.00112109	0.00471692	0.195274
OAS2_0121	Nondemented	0.00128298	0.000100744	0	0	0	0.000648845	0.0180359	0.134205
OAS2_0122	Nondemented	0.00352479	0.000639646	9.42755e-08	1.2614e-06	1.07751e-05	0.00168051	0.0571293	0.0103397
OAS2_0124	Demented	0.0156175	0.000132971	1.36645e-05	1.43535e-05	2.01981e-05	0.00153899	0.0252686	0.0243172
OAS2_0126	Nondemented	0.0271972	5.34746e-05	0	3.9164e-08	0	0.000854138	0.00340087	0.0257004
OAS2_0129	Nondemented	0.0218539	0.000776757	1.43571e-05	7.54511e-06	0.00017742	0.00118379	0.00789639	0.816646
OAS2_0134	Demented	0.00261188	0.000615302	0.000112581	0.000110104	0.00232	0.00598452	0.0542455	0.0455314
OAS2_0137	Demented	0.909819	0.00116815	0.000136876	9.24785e-05	0.000528781	0.000368704	0.0414768	0.049306
OAS2_0138	Nondemented	0.00399486	0.000287191	1.03993e-05	7.00217e-06	0.000802431	0.00194234	0.033286	0.0539501
OAS2_0139	Demented	0.0014447	2.91626e-05	3.55996e-06	1.64381e-05	3.12549e-06	0.00363886	0.00133917	0.00782191
OAS2_0140	Demented	0.195222	0.0020892	2.54922e-07	3.4804e-06	0.000720586	0.00138992	0.0216323	0.0282279
OAS2_0141	Nondemented	0.0269948	0.000686825	9.03831e-06	4.95186e-05	0.000203759	0.00378964	0.00947277	0.290069
OAS2_0142	Nondemented	0.00232317	0.00211329	0	0	0	0.00061161	0.00897122	0.150476
OAS2_0143	Nondemented	0.00774759	0.000432326	3.35183e-05	8.96011e-05	0.000971838	0.00140786	0.0629822	0.777117
OAS2_0146	Demented	0.00371697	0.000853538	0.000277761	0.000599397	0.000277088	0.00308061	0.00643012	0.758814
OAS2_0147	Nondemented	0.00444679	6.80738e-05	0.000104197	1.09863e-05	0	0.00100381	0.0138866	0.0290338
OAS2_0149	Nondemented	0.0170343	9.21514e-05	6.60089e-05	0.000199545	6.3011e-09	0.00118004	0.00477296	0.0158437
OAS2_0150	Demented	0.132268	0.000175805	0	4.33591e-08	0	0.00120864	0.0258794	0.0306084
OAS2_0152	Nondemented	0.00515299	0.000255355	2.90968e-05	1.72001e-05	0.000122495	0.00155076	0.0721031	0.0216342
OAS2_0154	Nondemented	0.197334	0.350294	6.96097e-08	0.00491914	0.00661156	0.012502	0.768527	0.819473
OAS2_0156	Nondemented	0.00289905	0.00161438	0.000116493	9.25798e-05	0.000281669	0.000990244	0.0160985	0.0253631
OAS2_0157	Demented	0.0370208	3.75825e-05	0	0	0	0.00158263	0.0174953	0.00991447
OAS2_0159	Demented	0.00472413	0.000879953	2.10688e-05	6.27741e-05	2.61333e-07	0.00332836	0.00760125	0.0826213
OAS2_0160	Demented	0.226424	0.000107009	5.4089e-09	6.47678e-07	0.000258189	0.00489413	0.0262103	0.260769
OAS2_0161	Nondemented	0.00317299	9.3777e-05	1.61156e-06	1.49877e-08	1.85216e-06	0.000970655	0.00552474	0.774915
OAS2_0162	Demented	0.87009	0.0012283	6.21939e-06	9.9435e-06	0.000158337	0.00119553	0.0809001	0.0219828
OAS2_0164	Demented	0.0399981	0.000571213	4.39631e-05	6.85664e-05	0.000697352	0.00232727	0.00644108	0.0126629
OAS2_0165	Demented	0.00266243	0.000630186	1.29035e-05	1.34493e-05	1.55753e-05	0.00176353	0.0185241	0.0602639
OAS2_0169	Nondemented	0.0344863	6.23084e-05	9.7596e-06	5.05339e-06	2.52555e-05	0.000991878	0.00615281	0.000554791
OAS2_0171	Nondemented	0.00149496	0.00026689	1.79655e-07	1.98555e-07	8.67032e-05	0.000769197	0.018335	0.0282127
OAS2_0174	Nondemented	0.0105984	0.000357757	4.19313e-06	4.14728e-06	2.82592e-06	0.00181882	0.0198854	0.0192676
OAS2_0175	Demented	0.016176	0.00012567	2.51995e-05	4.91237e-06	0.000111053	0.00255604	0.0507645	0.0497108
OAS2_0177	Nondemented	0.00219594	0.000693177	5.75443e-06	9.79923e-05	8.0649e-06	0.00210393	0.00346458	0.0303382
OAS2_0178	Nondemented	0.00510576	0.000246514	2.48582e-05	7.25524e-05	2.3547e-05	0.0014038	0.00109098	0.0812767
OAS2_0179	Demented	0.00175514	0.00150417	0.000222071	0.000301246	0.000563998	0.000998932	0.0470261	0.0055366
OAS2_0181	Demented	0.0519247	0.00274201	0.000265683	0.000268427	0.000276026	0.0149505	0.0397838	0.00918088
OAS2_0182	Demented	0.0075003	0.000151455	7.17556e-05	9.92259e-05	0.000880601	0.00119767	0.0101813	0.865731
OAS2_0183	Nondemented	0.01072	2.87034e-05	2.79687e-05	0.000118903	0.000276511	0.00126717	0.0362926	0.0457284
OAS2_0184	Demented	0.0261303	3.1887e-05	2.1803e-07	2.60885e-07	2.58861e-09	0.00141354	0.00506372	0.16352
OAS2_0185	Demented	0.0147988	0.000204216	6.34005e-05	3.91899e-05	1.83642e-05	0.00148873	0.00333569	0.207434
OAS2_0186	Nondemented	0.00135363	0.000148323	7.69905e-06	5.19991e-06	0	0.00118092	0.00216072	0.00944449

## Sheet: Fig2dADNI-AfterRegistration
		Kullback Leibler Divergence
SubjectID	CN-AD	None	Zscore	Fuzzy c-means	Gaussian Mixture model	Kernel density estimation	Histogram Matching	White stripe	RAVEL
129_4371	CN	0.807264	0.0366503	0.00218789	0.0293552	0.00150663	0.022213	0.1171	0.948079
130_4660	AD	0.00131933	0.000590385	4.16359e-05	5.25798e-05	0.0222934	0.000958771	0.15484	0.120396
002_4262	CN	0.519729	5.88769e-05	0	0	0	0.00287313	0.00531431	0.00507339
137_4258	AD	0.0108623	0.00365514	0	0	0.0693259	0.00317261	0.550623	1.12876
003_4288	CN	0.0389799	0.00974521	8.6695e-05	0.00165351	8.6695e-05	0.236126	0.0528261	3.75705
006_4192	AD	0.00222852	9.07364e-05	0	0	0	0.000808404	0.00451619	0.121648
035_4464	CN	0.203174	0.0194444	0.00221194	0.00256271	0.00235261	0.0168182	0.0744603	1.28666
016_4009	AD	0.00250364	0.001153	7.36386e-05	0.00620867	0.00090311	0.00230959	0.0143228	0.759447
130_4641	AD	0.00230426	0.00030333	8.42288e-06	2.93639e-05	0.000182127	0.000558	0.00514764	0.0169176
116_4625	AD	0.0255428	1.97348e-06	0	0	0	0.000121485	0.0031485	0.206441
116_4483	CN	0.0992419	6.34741e-05	0	0	0	0.011282	0.0107697	0.136626
023_4448	CN	0.117575	0	0	0	0	0.000102048	0.00484302	0.149193
098_4215	AD	0.0203167	0.000323595	7.6814e-08	2.57946e-07	0.00367532	0.0076067	0.0268886	0.552712
135_4657	AD	0.0311389	0.00148293	0	0	0	0.00158014	0.00148216	0.0206218
941_4292	CN	0.0313251	0.000137722	0	0	0	0.00203681	0.000271932	0.689497
009_4612	CN	0.0150724	0.000379509	0	0	0	0.0010102	0.0111719	0.0224622
127_4500	AD	0.0381571	0.00540413	0.000174851	0.000186234	0.000555732	0.00318976	0.0150653	0.29152
094_4089	AD	0.0512551	0.000848605	0.000137118	0.000665911	0.0131635	0.00304655	0.366262	0.530455
029_4384	CN	0.424887	0.00267266	3.72191e-07	4.0541e-07	5.52786e-07	0.00188902	0.00289356	0.118193
126_4494	AD	0.0477236	0.000715724	1.24111e-05	0.000216736	1.50393e-05	0.00525761	0.00881947	0.0586822
123_4526	AD	0.0277833	0.00016727	1.2334e-06	5.17362e-06	0.000591919	0.00214914	0.00893312	0.00142959
006_4153	AD	0.0290132	0.00174027	0	0	0	0.000394781	0.0226067	0.192608
128_4832	CN	0.00187974	3.33603e-06	0	0	0	0.00169493	0.000982454	0.330537
094_4560	CN	0.0114996	0.00342335	1.42755e-07	0	0	0.00102927	0.00764826	0.189643
016_4591	AD	0.00128714	0.00110774	0	0	0	0.0104782	0.00233645	1.06204
023_4501	AD	0.00612198	0.000190507	6.77885e-06	2.07908e-05	0.000964416	0.000485698	0.021096	0.0019394
099_4104	CN	0.668693	0.00926746	1.08847e-05	0.000255633	1.18428e-05	0.0292142	0.00764746	0.154012
135_4676	AD	0.00853499	9.10054e-05	1.04405e-06	1.22121e-05	0.000105605	0.000510946	0.00207309	0.0199225
019_4477	AD	0.000688169	0.000184777	0	0	0	0.00212732	0.00121923	0.0694051
137_4672	AD	0.0346341	0.000140256	1.45582e-06	4.02191e-06	9.76983e-06	0.00168703	0.00174125	0.117596
014_4039	AD	0.00934577	0.00289928	0.000199437	0.00137723	0.000216547	0.00228617	0.0129319	0.0226046
007_4516	CN	0.101967	0.00129105	2.90641e-06	3.02682e-06	2.90641e-06	0.00180385	0.00331062	1.5943
007_4568	AD	0.0299008	0.000835546	0.00153569	0.00200046	0.00407554	0.00225779	0.097532	0.627075
129_4422	CN	0.971942	0.00508622	0	0	0	0.0136064	0.0155027	0.950669
053_4578	CN	0.00166468	0.0016756	0	0	0	0.00263208	0.00137964	0.0099931
153_4172	AD	0.00201277	0.00033652	0	0	0	0.000445909	0.00197411	0.0428218
129_4369	CN	0.92583	0.0586097	0.000192096	0.000192096	0.000192096	0.0185363	0.0142975	2.71885
116_4195	AD	0.283247	7.89217e-05	0	0	0	0.00272263	0.000332875	0.116817
019_4252	AD	0.00115615	1.02982e-07	0	0	0	0.000383286	0.00343945	0.0274664
137_4211	AD	0.000435911	0.000331285	0	0	0	0.000370347	0.00373726	0.050094
094_4503	CN	0.0824574	0.256533	0.00216002	0.00188089	0.00440396	0.0499347	0.182531	1.17497
029_4585	CN	0.420764	0.028319	0	0	0	0.00354157	0.00139087	0.329531
029_4385	CN	0.265569	0.0066043	0.00026682	0.0235864	0.000265188	0.00555791	0.0407388	0.0973795
